# Supplementary material for: Speciation, thermodynamics and structure of Np(v) oxalate complexes in aqueous solution
Source: Royal Society of Chemistry journal article supplement (doi:10.1039/d0dt02379e), 2020-01-01
Supplement: d0dt02379e1.pdf [file d0dt02379e1.pdf]

# Speciation, thermodynamics and structure of Np(V) oxalate complexes in aqueous solution

M. M. Maiwald<sup>1</sup>, M. Trumm<sup>2</sup>, K. Dardenne<sup>2</sup>, J. Rothe<sup>2</sup>, A. Skerencak-Frech<sup>2</sup>, P. J. Panak<sup>1,2</sup>

- 1) Ruprecht Karls Universität Heidelberg, Physikalisch-Chemisches Institut, Im Neuenheimer Feld 253, D-69120 Heidelberg, Germany
- 2) Karlsruher Institut für Technologie (KIT), Institut für Nukleare Entsorgung (INE), D-76344 Eggenstein-Leopoldshafen, Germany

\* E-Mail: m.maiwald@pci.uni-heidelberg.de

## Supporting Information

### Figures:

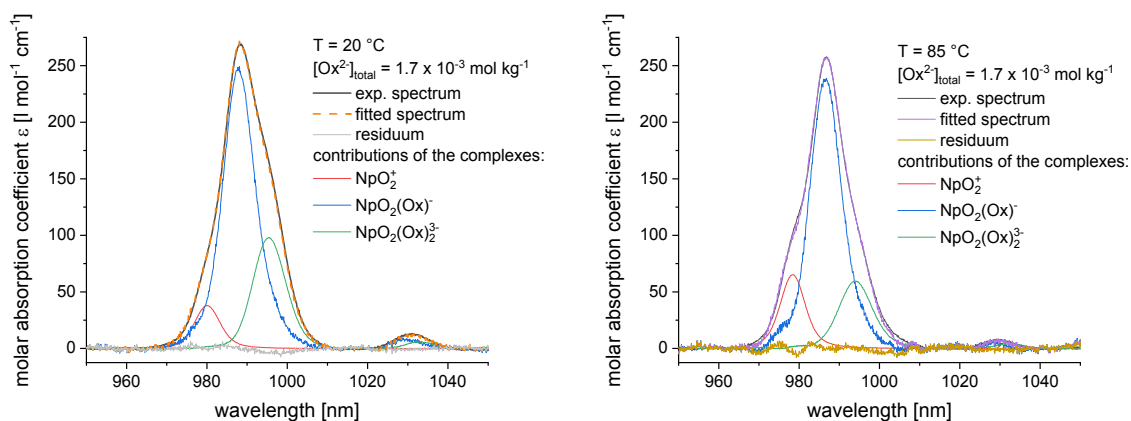

**Figure S1:** exemplary deconvolution of the absorption spectra of Np(V) at  $[Ox^{2-}]_{total} = 1.7 \times 10^{-3}$  mol kg<sup>-1</sup> at  $T = 20$  (left) and  $85$  °C (right) and  $I_m(NaClO_4) = 1.0$  mol kg<sup>-1</sup>;  $[H^+]_{total} = 2.1 \times 10^{-5}$  mol kg<sup>-1</sup>;  $[NpO_2^+]_{total} = 2.5 \times 10^{-4}$  mol kg<sup>-1</sup>.

## Tables

### Sample compositions of the performed absorption spectroscopic measurements

*Sample compositions for the determination of the complex stoichiometry as a function of the oxalate concentration at a fixed ionic strength  $I_m$ .*

**Table S1:** sample composition for the determination of the complex stoichiometry as a function of  $[\text{Ox}^{2-}]_{\text{total}}$  at  $I_m = 1.0 \text{ mol kg}^{-1} \text{ NaClO}_4$  and  $T = 20 \text{ }^\circ\text{C}$  and species distribution obtained by principle component analyses of the absorption spectra.

| Nr. | total concentrations              |                                   |                               | $I_m$<br>( $\text{NaClO}_4$ ) | eq. concentration          |                                | species fractions $\chi_i$ |                             |                                  |
|-----|-----------------------------------|-----------------------------------|-------------------------------|-------------------------------|----------------------------|--------------------------------|----------------------------|-----------------------------|----------------------------------|
|     | $[\text{NpO}_2^+]_{\text{total}}$ | $[\text{Ox}^{2-}]_{\text{total}}$ | $[\text{H}^+]_{\text{total}}$ |                               | $[\text{H}^+]_{\text{eq}}$ | $[\text{Ox}^{2-}]_{\text{eq}}$ | $\text{NpO}_2^+$           | $\text{NpO}_2(\text{Ox})^-$ | $\text{NpO}_2(\text{Ox})_2^{3-}$ |
| 1   | 2.51E-04                          | 0.00E+00                          | 2.08E-05                      | 1.00                          | 2.08E-05                   | 0.00E+00                       | 1                          | 0                           | 0                                |
| 2   | 2.51E-04                          | 3.51E-04                          | 2.08E-05                      | 1.00                          | 1.20E-05                   | 1.80E-04                       | 0.5                        | 0.49                        | 0                                |
| 3   | 2.50E-04                          | 8.35E-04                          | 2.08E-05                      | 1.00                          | 7.67E-06                   | 4.32E-04                       | 0.23                       | 0.68                        | 0.08                             |
| 4   | 2.49E-04                          | 1.66E-03                          | 2.08E-05                      | 1.00                          | 4.68E-06                   | 8.67E-04                       | 0.1                        | 0.71                        | 0.24                             |
| 5   | 2.48E-04                          | 2.49E-03                          | 2.08E-05                      | 1.00                          | 3.38E-06                   | 1.30E-03                       | 0.05                       | 0.61                        | 0.36                             |
| 8   | 2.47E-04                          | 3.31E-03                          | 2.07E-05                      | 1.00                          | 2.64E-06                   | 1.73E-03                       | 0.03                       | 0.55                        | 0.44                             |
| 7   | 2.46E-04                          | 4.39E-03                          | 2.07E-05                      | 1.00                          | 2.05E-06                   | 2.30E-03                       | 0.02                       | 0.48                        | 0.52                             |
| 8   | 2.45E-04                          | 5.73E-03                          | 2.07E-05                      | 1.00                          | 1.60E-06                   | 3.01E-03                       | 0.01                       | 0.41                        | 0.59                             |
| 9   | 2.43E-04                          | 7.59E-03                          | 2.07E-05                      | 1.00                          | 1.23E-06                   | 3.98E-03                       | 0                          | 0.37                        | 0.69                             |
| 10  | 2.41E-04                          | 1.05E-02                          | 2.06E-05                      | 0.99                          | 9.05E-07                   | 5.49E-03                       | 0.01                       | 0.3                         | 0.73                             |
| 11  | 2.37E-04                          | 1.43E-02                          | 2.06E-05                      | 0.99                          | 6.68E-07                   | 7.50E-03                       | 0                          | 0.25                        | 0.75                             |

**Table S2:** sample composition for the determination of the complex stoichiometry as a function of  $[\text{Ox}^{2-}]_{\text{total}}$  at  $I_m = 1.0 \text{ mol kg}^{-1} \text{ NaClO}_4$  and  $T = 30 \text{ }^\circ\text{C}$  and species distribution obtained by principle component analyses of the absorption spectra.

| Nr. | total concentrations              |                                   |                               | $I_m$<br>( $\text{NaClO}_4$ ) | eq. concentration          |                                | species fractions $\chi_i$ |                             |                                  |
|-----|-----------------------------------|-----------------------------------|-------------------------------|-------------------------------|----------------------------|--------------------------------|----------------------------|-----------------------------|----------------------------------|
|     | $[\text{NpO}_2^+]_{\text{total}}$ | $[\text{Ox}^{2-}]_{\text{total}}$ | $[\text{H}^+]_{\text{total}}$ |                               | $[\text{H}^+]_{\text{eq}}$ | $[\text{Ox}^{2-}]_{\text{eq}}$ | $\text{NpO}_2^+$           | $\text{NpO}_2(\text{Ox})^-$ | $\text{NpO}_2(\text{Ox})_2^{3-}$ |
| 1   | 2.51E-04                          | 0.00E+00                          | 2.08E-05                      | 1.00                          | 2.08E-05                   | 0.00E+00                       | 1                          | 0                           | 0                                |
| 2   | 2.51E-04                          | 3.51E-04                          | 2.08E-05                      | 1.00                          | 1.77E-04                   | 1.77E-04                       | 0.51                       | 0.48                        | 0                                |
| 3   | 2.50E-04                          | 8.35E-04                          | 2.08E-05                      | 1.00                          | 7.41E-06                   | 4.24E-04                       | 0.24                       | 0.68                        | 0.08                             |
| 4   | 2.49E-04                          | 1.66E-03                          | 2.08E-05                      | 1.00                          | 4.50E-06                   | 8.51E-04                       | 0.1                        | 0.73                        | 0.23                             |
| 5   | 2.48E-04                          | 2.49E-03                          | 2.08E-05                      | 1.00                          | 3.23E-06                   | 1.28E-03                       | 0.05                       | 0.63                        | 0.34                             |
| 8   | 2.47E-04                          | 3.31E-03                          | 2.07E-05                      | 1.00                          | 2.52E-06                   | 1.70E-03                       | 0.03                       | 0.57                        | 0.42                             |
| 7   | 2.46E-04                          | 4.39E-03                          | 2.07E-05                      | 1.00                          | 1.95E-06                   | 2.26E-03                       | 0.01                       | 0.5                         | 0.51                             |
| 8   | 2.45E-04                          | 5.73E-03                          | 2.07E-05                      | 1.00                          | 1.53E-06                   | 2.95E-03                       | 0                          | 0.44                        | 0.58                             |
| 9   | 2.43E-04                          | 7.59E-03                          | 2.07E-05                      | 1.00                          | 1.17E-06                   | 3.91E-03                       | 0                          | 0.4                         | 0.68                             |
| 10  | 2.41E-04                          | 1.05E-02                          | 2.06E-05                      | 0.99                          | 8.60E-07                   | 5.39E-03                       | 0                          | 0.3                         | 0.71                             |
| 11  | 2.37E-04                          | 1.43E-02                          | 2.06E-05                      | 0.99                          | 6.35E-07                   | 7.36E-03                       | 0                          | 0.25                        | 0.76                             |

**Table S3:** sample composition for the determination of the complex stoichiometry as a function of  $[\text{Ox}^{2-}]_{\text{total}}$  at  $I_m = 1.0 \text{ mol kg}^{-1} \text{ NaClO}_4$  and  $T = 40 \text{ }^\circ\text{C}$  and species distribution obtained by principle component analyses of the absorption spectra.

| Nr. | total concentrations              |                                   |                               | $I_m$<br>( $\text{NaClO}_4$ ) | eq. concentration          |                                | species fractions $\chi_i$ |                             |                                  |
|-----|-----------------------------------|-----------------------------------|-------------------------------|-------------------------------|----------------------------|--------------------------------|----------------------------|-----------------------------|----------------------------------|
|     | $[\text{NpO}_2^+]_{\text{total}}$ | $[\text{Ox}^{2-}]_{\text{total}}$ | $[\text{H}^+]_{\text{total}}$ |                               | $[\text{H}^+]_{\text{eq}}$ | $[\text{Ox}^{2-}]_{\text{eq}}$ | $\text{NpO}_2^+$           | $\text{NpO}_2(\text{Ox})^-$ | $\text{NpO}_2(\text{Ox})_2^{3-}$ |
| 1   | 2.51E-04                          | 0.00E+00                          | 2.08E-05                      | 1.00                          | 2.08E-05                   | 0.00E+00                       | 1                          | 0                           | 0                                |
| 2   | 2.51E-04                          | 3.51E-04                          | 2.08E-05                      | 1.00                          | 1.14E-05                   | 1.73E-04                       | 0.51                       | 0.47                        | 0                                |
| 3   | 2.50E-04                          | 8.35E-04                          | 2.08E-05                      | 1.00                          | 7.10E-06                   | 4.14E-04                       | 0.25                       | 0.69                        | 0.06                             |
| 4   | 2.49E-04                          | 1.66E-03                          | 2.08E-05                      | 1.00                          | 4.27E-06                   | 8.30E-04                       | 0.1                        | 0.75                        | 0.2                              |
| 5   | 2.48E-04                          | 2.49E-03                          | 2.08E-05                      | 1.00                          | 3.05E-06                   | 1.25E-03                       | 0.05                       | 0.68                        | 0.28                             |
| 8   | 2.47E-04                          | 3.31E-03                          | 2.07E-05                      | 1.00                          | 2.38E-06                   | 1.66E-03                       | 0.02                       | 0.62                        | 0.37                             |
| 7   | 2.46E-04                          | 4.39E-03                          | 2.07E-05                      | 1.00                          | 1.84E-06                   | 2.20E-03                       | 0.01                       | 0.56                        | 0.45                             |
| 8   | 2.45E-04                          | 5.73E-03                          | 2.07E-05                      | 1.00                          | 1.43E-06                   | 2.88E-03                       | 0                          | 0.49                        | 0.52                             |
| 9   | 2.43E-04                          | 7.59E-03                          | 2.07E-05                      | 1.00                          | 1.10E-06                   | 3.82E-03                       | 0                          | 0.45                        | 0.62                             |
| 10  | 2.41E-04                          | 1.05E-02                          | 2.06E-05                      | 0.99                          | 8.07E-07                   | 5.27E-03                       | 0                          | 0.34                        | 0.65                             |
| 11  | 2.37E-04                          | 1.43E-02                          | 2.06E-05                      | 0.99                          | 5.95E-07                   | 7.19E-03                       | 0                          | 0.3                         | 0.7                              |

**Table S4:** sample composition for the determination of the complex stoichiometry as a function of  $[\text{Ox}^{2-}]_{\text{total}}$  at  $I_m = 1.0 \text{ mol kg}^{-1} \text{ NaClO}_4$  and  $T = 50 \text{ }^\circ\text{C}$  and species distribution obtained by principle component analyses of the absorption spectra.

| Nr. | total concentrations              |                                   |                               | $I_m$<br>( $\text{NaClO}_4$ ) | eq. concentration          |                                | species fractions $\chi_i$ |                             |                                  |
|-----|-----------------------------------|-----------------------------------|-------------------------------|-------------------------------|----------------------------|--------------------------------|----------------------------|-----------------------------|----------------------------------|
|     | $[\text{NpO}_2^+]_{\text{total}}$ | $[\text{Ox}^{2-}]_{\text{total}}$ | $[\text{H}^+]_{\text{total}}$ |                               | $[\text{H}^+]_{\text{eq}}$ | $[\text{Ox}^{2-}]_{\text{eq}}$ | $\text{NpO}_2^+$           | $\text{NpO}_2(\text{Ox})^-$ | $\text{NpO}_2(\text{Ox})_2^{3-}$ |
| 1   | 2.51E-04                          | 0.00E+00                          | 2.08E-05                      | 1.00                          | 2.08E-05                   | 0.00E+00                       | 1                          | 0                           | 0                                |
| 2   | 2.51E-04                          | 3.51E-04                          | 2.08E-05                      | 1.00                          | 1.10E-05                   | 1.69E-04                       | 0.53                       | 0.45                        | 0                                |
| 3   | 2.50E-04                          | 8.35E-04                          | 2.08E-05                      | 1.00                          | 6.77E-06                   | 4.04E-04                       | 0.25                       | 0.68                        | 0.06                             |
| 4   | 2.49E-04                          | 1.66E-03                          | 2.08E-05                      | 1.00                          | 4.03E-06                   | 8.12E-04                       | 0.1                        | 0.75                        | 0.19                             |
| 5   | 2.48E-04                          | 2.49E-03                          | 2.08E-05                      | 1.00                          | 2.87E-06                   | 1.22E-03                       | 0.05                       | 0.66                        | 0.29                             |
| 8   | 2.47E-04                          | 3.31E-03                          | 2.07E-05                      | 1.00                          | 2.23E-06                   | 1.62E-03                       | 0.01                       | 0.62                        | 0.37                             |
| 7   | 2.46E-04                          | 4.39E-03                          | 2.07E-05                      | 1.00                          | 1.72E-06                   | 2.16E-03                       | 0                          | 0.54                        | 0.47                             |
| 8   | 2.45E-04                          | 5.73E-03                          | 2.07E-05                      | 1.00                          | 1.34E-06                   | 2.82E-03                       | 0                          | 0.47                        | 0.54                             |
| 9   | 2.43E-04                          | 7.59E-03                          | 2.07E-05                      | 1.00                          | 1.03E-06                   | 3.73E-03                       | 0                          | 0.42                        | 0.65                             |
| 10  | 2.41E-04                          | 1.05E-02                          | 2.06E-05                      | 0.99                          | 7.53E-07                   | 5.15E-03                       | 0                          | 0.31                        | 0.68                             |
| 11  | 2.37E-04                          | 1.43E-02                          | 2.06E-05                      | 0.99                          | 5.55E-07                   | 7.03E-03                       | 0                          | 0.25                        | 0.75                             |

**Table S5:** sample composition for the determination of the complex stoichiometry as a function of  $[\text{Ox}^{2-}]_{\text{total}}$  at  $I_m = 1.0 \text{ mol kg}^{-1} \text{ NaClO}_4$  and  $T = 60 \text{ }^\circ\text{C}$  and species distribution obtained by principle component analyses of the absorption spectra.

| Nr. | total concentrations              |                                   |                               | $I_m$<br>( $\text{NaClO}_4$ ) | eq. concentration          |                                | species fractions $\chi_i$ |                             |                                  |
|-----|-----------------------------------|-----------------------------------|-------------------------------|-------------------------------|----------------------------|--------------------------------|----------------------------|-----------------------------|----------------------------------|
|     | $[\text{NpO}_2^+]_{\text{total}}$ | $[\text{Ox}^{2-}]_{\text{total}}$ | $[\text{H}^+]_{\text{total}}$ |                               | $[\text{H}^+]_{\text{eq}}$ | $[\text{Ox}^{2-}]_{\text{eq}}$ | $\text{NpO}_2^+$           | $\text{NpO}_2(\text{Ox})^-$ | $\text{NpO}_2(\text{Ox})_2^{3-}$ |
| 1   | 2.51E-04                          | 0.00E+00                          | 2.08E-05                      | 1.00                          | 2.08E-05                   | 0.00E+00                       | 1                          | 0                           | 0                                |
| 2   | 2.51E-04                          | 3.51E-04                          | 2.08E-05                      | 1.00                          | 1.06E-05                   | 1.64E-04                       | 0.57                       | 0.42                        | 0                                |
| 3   | 2.50E-04                          | 8.35E-04                          | 2.08E-05                      | 1.00                          | 6.41E-06                   | 3.95E-04                       | 0.31                       | 0.64                        | 0.05                             |
| 4   | 2.49E-04                          | 1.66E-03                          | 2.08E-05                      | 1.00                          | 3.77E-06                   | 7.93E-04                       | 0.15                       | 0.74                        | 0.17                             |
| 5   | 2.48E-04                          | 2.49E-03                          | 2.08E-05                      | 1.00                          | 2.68E-06                   | 1.19E-03                       | 0.08                       | 0.67                        | 0.27                             |
| 8   | 2.47E-04                          | 3.31E-03                          | 2.07E-05                      | 1.00                          | 2.08E-06                   | 1.58E-03                       | 0.05                       | 0.63                        | 0.34                             |
| 7   | 2.46E-04                          | 4.39E-03                          | 2.07E-05                      | 1.00                          | 1.60E-06                   | 2.11E-03                       | 0.03                       | 0.57                        | 0.43                             |
| 8   | 2.45E-04                          | 5.73E-03                          | 2.07E-05                      | 1.00                          | 1.24E-06                   | 2.75E-03                       | 0.02                       | 0.51                        | 0.5                              |
| 9   | 2.43E-04                          | 7.59E-03                          | 2.07E-05                      | 1.00                          | 9.51E-07                   | 3.65E-03                       | 0.02                       | 0.46                        | 0.6                              |
| 10  | 2.41E-04                          | 1.05E-02                          | 2.06E-05                      | 0.99                          | 6.97E-07                   | 5.03E-03                       | 0.01                       | 0.35                        | 0.64                             |
| 11  | 2.37E-04                          | 1.43E-02                          | 2.06E-05                      | 0.99                          | 5.13E-07                   | 6.87E-03                       | 0.01                       | 0.31                        | 0.7                              |

**Table S6:** sample composition for the determination of the complex stoichiometry as a function of  $[\text{Ox}^{2-}]_{\text{total}}$  at  $I_m = 1.0 \text{ mol kg}^{-1} \text{ NaClO}_4$  and  $T = 70 \text{ }^\circ\text{C}$  and species distribution obtained by principle component analyses of the absorption spectra.

| Nr. | total concentrations              |                                   |                               | $I_m$<br>( $\text{NaClO}_4$ ) | eq. concentration          |                                | species fractions $\chi_i$ |                             |                                  |
|-----|-----------------------------------|-----------------------------------|-------------------------------|-------------------------------|----------------------------|--------------------------------|----------------------------|-----------------------------|----------------------------------|
|     | $[\text{NpO}_2^+]_{\text{total}}$ | $[\text{Ox}^{2-}]_{\text{total}}$ | $[\text{H}^+]_{\text{total}}$ |                               | $[\text{H}^+]_{\text{eq}}$ | $[\text{Ox}^{2-}]_{\text{eq}}$ | $\text{NpO}_2^+$           | $\text{NpO}_2(\text{Ox})^-$ | $\text{NpO}_2(\text{Ox})_2^{3-}$ |
| 1   | 2.51E-04                          | 0.00E+00                          | 2.08E-05                      | 1.00                          | 2.08E-05                   | 0.00E+00                       | 1                          | 0                           | 0                                |
| 2   | 2.51E-04                          | 3.51E-04                          | 2.08E-05                      | 1.00                          | 1.02E-05                   | 1.60E-04                       | 0.57                       | 0.41                        | 0                                |
| 3   | 2.50E-04                          | 8.35E-04                          | 2.08E-05                      | 1.00                          | 6.02E-06                   | 3.85E-04                       | 0.32                       | 0.62                        | 0.05                             |
| 4   | 2.49E-04                          | 1.66E-03                          | 2.08E-05                      | 1.00                          | 3.51E-06                   | 7.73E-04                       | 0.17                       | 0.75                        | 0.16                             |
| 5   | 2.48E-04                          | 2.49E-03                          | 2.08E-05                      | 1.00                          | 2.47E-06                   | 1.16E-03                       | 0.09                       | 0.69                        | 0.25                             |
| 8   | 2.47E-04                          | 3.31E-03                          | 2.07E-05                      | 1.00                          | 1.91E-06                   | 1.54E-03                       | 0.06                       | 0.64                        | 0.33                             |
| 7   | 2.46E-04                          | 4.39E-03                          | 2.07E-05                      | 1.00                          | 1.47E-06                   | 2.05E-03                       | 0.04                       | 0.59                        | 0.41                             |
| 8   | 2.45E-04                          | 5.73E-03                          | 2.07E-05                      | 1.00                          | 1.14E-06                   | 2.68E-03                       | 0.02                       | 0.53                        | 0.48                             |
| 9   | 2.43E-04                          | 7.59E-03                          | 2.07E-05                      | 1.00                          | 8.73E-07                   | 3.56E-03                       | 0.02                       | 0.49                        | 0.57                             |
| 10  | 2.41E-04                          | 1.05E-02                          | 2.06E-05                      | 0.99                          | 6.39E-07                   | 4.90E-03                       | 0.01                       | 0.38                        | 0.61                             |
| 11  | 2.37E-04                          | 1.43E-02                          | 2.06E-05                      | 0.99                          | 4.70E-07                   | 6.69E-03                       | 0                          | 0.33                        | 0.67                             |

**Table S7** sample composition for the determination of the complex stoichiometry as a function of  $[\text{Ox}^{2-}]_{\text{total}}$  at  $I_m = 1.0 \text{ mol kg}^{-1} \text{ NaClO}_4$  and  $T = 80 \text{ }^\circ\text{C}$  and species distribution obtained by principle component analyses of the absorption spectra.

| Nr. | total concentrations              |                                   |                               | $I_m$<br>( $\text{NaClO}_4$ ) | eq. concentration          |                                | species fractions $\chi_i$ |                             |                                  |
|-----|-----------------------------------|-----------------------------------|-------------------------------|-------------------------------|----------------------------|--------------------------------|----------------------------|-----------------------------|----------------------------------|
|     | $[\text{NpO}_2^+]_{\text{total}}$ | $[\text{Ox}^{2-}]_{\text{total}}$ | $[\text{H}^+]_{\text{total}}$ |                               | $[\text{H}^+]_{\text{eq}}$ | $[\text{Ox}^{2-}]_{\text{eq}}$ | $\text{NpO}_2^+$           | $\text{NpO}_2(\text{Ox})^-$ | $\text{NpO}_2(\text{Ox})_2^{3-}$ |
| 1   | 2.51E-04                          | 0.00E+00                          | 2.08E-05                      | 1.00                          | 2.08E-05                   | 0.00E+00                       | 1                          | 0                           | 0                                |
| 2   | 2.51E-04                          | 3.51E-04                          | 2.08E-05                      | 1.00                          | 9.69E-06                   | 1.56E-04                       | 0.6                        | 0.41                        | 0                                |
| 3   | 2.50E-04                          | 8.35E-04                          | 2.08E-05                      | 1.00                          | 5.63E-06                   | 3.76E-04                       | 0.33                       | 0.64                        | 0.05                             |
| 4   | 2.49E-04                          | 1.66E-03                          | 2.08E-05                      | 1.00                          | 3.24E-06                   | 7.56E-04                       | 0.18                       | 0.75                        | 0.16                             |
| 5   | 2.48E-04                          | 2.49E-03                          | 2.08E-05                      | 1.00                          | 2.28E-06                   | 1.13E-03                       | 0.1                        | 0.71                        | 0.24                             |
| 8   | 2.47E-04                          | 3.31E-03                          | 2.07E-05                      | 1.00                          | 1.76E-06                   | 1.51E-03                       | 0.07                       | 0.68                        | 0.3                              |
| 7   | 2.46E-04                          | 4.39E-03                          | 2.07E-05                      | 1.00                          | 1.35E-06                   | 2.01E-03                       | 0.05                       | 0.61                        | 0.39                             |
| 8   | 2.45E-04                          | 5.73E-03                          | 2.07E-05                      | 1.00                          | 1.05E-06                   | 2.63E-03                       | 0.03                       | 0.57                        | 0.46                             |
| 9   | 2.43E-04                          | 7.59E-03                          | 2.07E-05                      | 1.00                          | 7.98E-07                   | 3.48E-03                       | 0.02                       | 0.51                        | 0.55                             |
| 10  | 2.41E-04                          | 1.05E-02                          | 2.06E-05                      | 0.99                          | 5.84E-07                   | 4.80E-03                       | 0.01                       | 0.41                        | 0.59                             |
| 11  | 2.37E-04                          | 1.43E-02                          | 2.06E-05                      | 0.99                          | 4.29E-07                   | 6.55E-03                       | 0.01                       | 0.35                        | 0.65                             |

**Table S8:** sample composition for the determination of the complex stoichiometry as a function of  $[\text{Ox}^{2-}]_{\text{total}}$  at  $I_m = 1.0 \text{ mol kg}^{-1} \text{ NaClO}_4$  and  $T = 85 \text{ }^\circ\text{C}$  and species distribution obtained by principle component analyses of the absorption spectra.

| Nr. | total concentrations              |                                   |                               | $I_m$<br>( $\text{NaClO}_4$ ) | eq. concentration          |                                | species fractions $\chi_i$ |                             |                                  |
|-----|-----------------------------------|-----------------------------------|-------------------------------|-------------------------------|----------------------------|--------------------------------|----------------------------|-----------------------------|----------------------------------|
|     | $[\text{NpO}_2^+]_{\text{total}}$ | $[\text{Ox}^{2-}]_{\text{total}}$ | $[\text{H}^+]_{\text{total}}$ |                               | $[\text{H}^+]_{\text{eq}}$ | $[\text{Ox}^{2-}]_{\text{eq}}$ | $\text{NpO}_2^+$           | $\text{NpO}_2(\text{Ox})^-$ | $\text{NpO}_2(\text{Ox})_2^{3-}$ |
| 1   | 2.51E-04                          | 0.00E+00                          | 2.08E-05                      | 1.00                          | 2.08E-05                   | 0.00E+00                       | 1                          | 0                           | 0                                |
| 2   | 2.51E-04                          | 3.51E-04                          | 2.08E-05                      | 1.00                          | 9.32E-06                   | 1.50E-04                       | 0.6                        | 0.4                         | 0                                |
| 3   | 2.50E-04                          | 8.35E-04                          | 2.08E-05                      | 1.00                          | 5.33E-06                   | 3.61E-04                       | 0.35                       | 0.65                        | 0.05                             |
| 4   | 2.49E-04                          | 1.66E-03                          | 2.08E-05                      | 1.00                          | 3.04E-06                   | 7.25E-04                       | 0.18                       | 0.77                        | 0.15                             |
| 5   | 2.48E-04                          | 2.49E-03                          | 2.08E-05                      | 1.00                          | 2.13E-06                   | 1.09E-03                       | 0.1                        | 0.73                        | 0.23                             |
| 8   | 2.47E-04                          | 3.31E-03                          | 2.07E-05                      | 1.00                          | 1.64E-06                   | 1.45E-03                       | 0.07                       | 0.7                         | 0.3                              |
| 7   | 2.46E-04                          | 4.39E-03                          | 2.07E-05                      | 1.00                          | 1.26E-06                   | 1.93E-03                       | 0.05                       | 0.63                        | 0.38                             |
| 8   | 2.45E-04                          | 5.73E-03                          | 2.07E-05                      | 1.00                          | 9.75E-07                   | 2.52E-03                       | 0.03                       | 0.57                        | 0.45                             |
| 9   | 2.43E-04                          | 7.59E-03                          | 2.07E-05                      | 1.00                          | 7.43E-07                   | 3.34E-03                       | 0.03                       | 0.53                        | 0.54                             |
| 10  | 2.41E-04                          | 1.05E-02                          | 2.06E-05                      | 0.99                          | 5.43E-07                   | 4.60E-03                       | 0.02                       | 0.43                        | 0.58                             |
| 11  | 2.37E-04                          | 1.43E-02                          | 2.06E-05                      | 0.99                          | 3.99E-07                   | 6.28E-03                       | 0.01                       | 0.37                        | 0.64                             |

**Sample compositions for the determination of ionic strength effects for the complexation of Np(V) with oxalate as a function of the ionic strength  $I_m$  at fixed oxalate concentrations.**

Used background electrolyte:  $\text{NaClO}_4$

**Table S9:** sample composition for the determination of ionic strength effects for the complexation of Np(V) with  $\text{Ox}^{2-}$  as a function of  $I_m(\text{NaClO}_4)$  at  $T = 20\text{ }^\circ\text{C}$  and species distribution obtained by principle component analyses of the absorption spectra.

| Nr. | total concentrations              |                                   |                               | $I_m$<br>( $\text{NaClO}_4$ ) | eq. concentration          |                                | species fractions $\chi_i$ |                             |                                  |
|-----|-----------------------------------|-----------------------------------|-------------------------------|-------------------------------|----------------------------|--------------------------------|----------------------------|-----------------------------|----------------------------------|
|     | $[\text{NpO}_2^+]_{\text{total}}$ | $[\text{Ox}^{2-}]_{\text{total}}$ | $[\text{H}^+]_{\text{total}}$ |                               | $[\text{H}^+]_{\text{eq}}$ | $[\text{Ox}^{2-}]_{\text{eq}}$ | $\text{NpO}_2^+$           | $\text{NpO}_2(\text{Ox})^-$ | $\text{NpO}_2(\text{Ox})_2^{3-}$ |
| 1   | 1.75E-04                          | 5.36E-03                          | 1.78E-05                      | 0.49                          | 1.15E-06                   | 3.25E-03                       | 0.01                       | 0.49                        | 0.49                             |
| 2   | 1.73E-04                          | 5.29E-03                          | 1.78E-05                      | 0.68                          | 1.32E-06                   | 3.00E-03                       | 0.01                       | 0.46                        | 0.53                             |
| 3   | 1.70E-04                          | 5.22E-03                          | 1.78E-05                      | 0.87                          | 1.45E-06                   | 2.81E-03                       | 0.01                       | 0.44                        | 0.55                             |
| 4   | 1.68E-04                          | 5.14E-03                          | 1.78E-05                      | 1.07                          | 1.55E-06                   | 2.66E-03                       | 0.01                       | 0.41                        | 0.58                             |
| 5   | 1.65E-04                          | 5.06E-03                          | 1.78E-05                      | 1.29                          | 1.63E-06                   | 2.52E-03                       | 0.01                       | 0.40                        | 0.59                             |
| 8   | 1.62E-04                          | 4.97E-03                          | 1.78E-05                      | 1.51                          | 1.69E-06                   | 2.41E-03                       | 0.01                       | 0.38                        | 0.61                             |
| 7   | 1.59E-04                          | 4.88E-03                          | 1.78E-05                      | 1.75                          | 1.72E-06                   | 2.31E-03                       | 0.01                       | 0.36                        | 0.63                             |
| 8   | 1.56E-04                          | 4.78E-03                          | 1.79E-05                      | 2.01                          | 1.74E-06                   | 2.22E-03                       | 0.01                       | 0.35                        | 0.64                             |

**Table S10:** sample composition for the determination of ionic strength effects for the complexation of Np(V) with  $\text{Ox}^{2-}$  as a function of  $I_m(\text{NaClO}_4)$  at  $T = 30\text{ }^\circ\text{C}$  and species distribution obtained by principle component analyses of the absorption spectra.

| Nr. | total concentrations              |                                   |                               | $I_m$<br>( $\text{NaClO}_4$ ) | eq. concentration          |                                | species fractions $\chi_i$ |                             |                                  |
|-----|-----------------------------------|-----------------------------------|-------------------------------|-------------------------------|----------------------------|--------------------------------|----------------------------|-----------------------------|----------------------------------|
|     | $[\text{NpO}_2^+]_{\text{total}}$ | $[\text{Ox}^{2-}]_{\text{total}}$ | $[\text{H}^+]_{\text{total}}$ |                               | $[\text{H}^+]_{\text{eq}}$ | $[\text{Ox}^{2-}]_{\text{eq}}$ | $\text{NpO}_2^+$           | $\text{NpO}_2(\text{Ox})^-$ | $\text{NpO}_2(\text{Ox})_2^{3-}$ |
| 1   | 1.75E-04                          | 5.36E-03                          | 1.78E-05                      | 0.49                          | 1.09E-06                   | 3.19E-03                       | 0.01                       | 0.50                        | 0.49                             |
| 2   | 1.73E-04                          | 5.29E-03                          | 1.78E-05                      | 0.68                          | 1.25E-06                   | 2.95E-03                       | 0.01                       | 0.48                        | 0.51                             |
| 3   | 1.70E-04                          | 5.22E-03                          | 1.78E-05                      | 0.87                          | 1.38E-06                   | 2.76E-03                       | 0.01                       | 0.45                        | 0.54                             |
| 4   | 1.68E-04                          | 5.14E-03                          | 1.78E-05                      | 1.07                          | 1.48E-06                   | 2.61E-03                       | 0.01                       | 0.43                        | 0.56                             |
| 5   | 1.65E-04                          | 5.06E-03                          | 1.78E-05                      | 1.29                          | 1.56E-06                   | 2.48E-03                       | 0.01                       | 0.41                        | 0.58                             |
| 8   | 1.62E-04                          | 4.97E-03                          | 1.78E-05                      | 1.51                          | 1.61E-06                   | 2.37E-03                       | 0.01                       | 0.39                        | 0.60                             |
| 7   | 1.59E-04                          | 4.88E-03                          | 1.78E-05                      | 1.75                          | 1.64E-06                   | 2.27E-03                       | 0.01                       | 0.37                        | 0.62                             |
| 8   | 1.56E-04                          | 4.78E-03                          | 1.79E-05                      | 2.01                          | 1.66E-06                   | 2.18E-03                       | 0.01                       | 0.36                        | 0.63                             |

**Table S11:** sample composition for the determination of ionic strength effects for the complexation of Np(V) with  $\text{Ox}^{2-}$  as a function of  $I_m(\text{NaClO}_4)$  at  $T = 40\text{ }^\circ\text{C}$  and species distribution obtained by principle component analyses of the absorption spectra.

| Nr. | total concentrations              |                                   |                               | $I_m$<br>( $\text{NaClO}_4$ ) | eq. concentration          |                                | species fractions $\chi_i$ |                             |                                  |
|-----|-----------------------------------|-----------------------------------|-------------------------------|-------------------------------|----------------------------|--------------------------------|----------------------------|-----------------------------|----------------------------------|
|     | $[\text{NpO}_2^+]_{\text{total}}$ | $[\text{Ox}^{2-}]_{\text{total}}$ | $[\text{H}^+]_{\text{total}}$ |                               | $[\text{H}^+]_{\text{eq}}$ | $[\text{Ox}^{2-}]_{\text{eq}}$ | $\text{NpO}_2^+$           | $\text{NpO}_2(\text{Ox})^-$ | $\text{NpO}_2(\text{Ox})_2^{3-}$ |
| 1   | 1.75E-04                          | 5.36E-03                          | 1.78E-05                      | 0.49                          | 1.02E-06                   | 3.13E-03                       | 0.00                       | 0.56                        | 0.44                             |
| 2   | 1.73E-04                          | 5.29E-03                          | 1.78E-05                      | 0.68                          | 1.17E-06                   | 2.88E-03                       | 0.00                       | 0.53                        | 0.47                             |
| 3   | 1.70E-04                          | 5.22E-03                          | 1.78E-05                      | 0.87                          | 1.30E-06                   | 2.70E-03                       | 0.00                       | 0.51                        | 0.49                             |
| 4   | 1.68E-04                          | 5.14E-03                          | 1.78E-05                      | 1.07                          | 1.39E-06                   | 2.55E-03                       | 0.00                       | 0.48                        | 0.52                             |
| 5   | 1.65E-04                          | 5.06E-03                          | 1.78E-05                      | 1.29                          | 1.47E-06                   | 2.42E-03                       | 0.00                       | 0.47                        | 0.53                             |
| 8   | 1.62E-04                          | 4.97E-03                          | 1.78E-05                      | 1.51                          | 1.52E-06                   | 2.31E-03                       | 0.00                       | 0.45                        | 0.55                             |
| 7   | 1.59E-04                          | 4.88E-03                          | 1.78E-05                      | 1.75                          | 1.55E-06                   | 2.21E-03                       | 0.00                       | 0.43                        | 0.57                             |
| 8   | 1.56E-04                          | 4.78E-03                          | 1.79E-05                      | 2.01                          | 1.57E-06                   | 2.13E-03                       | 0.00                       | 0.42                        | 0.58                             |

**Table S12:** sample composition for the determination of ionic strength effects for the complexation of Np(V) with  $\text{Ox}^{2-}$  as a function of  $I_m(\text{NaClO}_4)$  at  $T = 50^\circ\text{C}$  and species distribution obtained by principle component analyses of the absorption spectra.

| Nr. | total concentrations              |                                   |                               | $I_m$<br>( $\text{NaClO}_4$ ) | eq. concentration          |                                | species fractions $\chi_i$ |                             |                                  |
|-----|-----------------------------------|-----------------------------------|-------------------------------|-------------------------------|----------------------------|--------------------------------|----------------------------|-----------------------------|----------------------------------|
|     | $[\text{NpO}_2^+]_{\text{total}}$ | $[\text{Ox}^{2-}]_{\text{total}}$ | $[\text{H}^+]_{\text{total}}$ |                               | $[\text{H}^+]_{\text{eq}}$ | $[\text{Ox}^{2-}]_{\text{eq}}$ | $\text{NpO}_2^+$           | $\text{NpO}_2(\text{Ox})^-$ | $\text{NpO}_2(\text{Ox})_2^{3-}$ |
| 1   | 1.75E-04                          | 5.36E-03                          | 1.78E-05                      | 0.49                          | 9.43E-07                   | 3.06E-03                       | 0.00                       | 0.55                        | 0.45                             |
| 2   | 1.73E-04                          | 5.29E-03                          | 1.78E-05                      | 0.68                          | 1.09E-06                   | 2.82E-03                       | 0.00                       | 0.52                        | 0.48                             |
| 3   | 1.70E-04                          | 5.22E-03                          | 1.78E-05                      | 0.87                          | 1.21E-06                   | 2.64E-03                       | 0.00                       | 0.48                        | 0.52                             |
| 4   | 1.68E-04                          | 5.14E-03                          | 1.78E-05                      | 1.07                          | 1.30E-06                   | 2.49E-03                       | 0.00                       | 0.46                        | 0.54                             |
| 5   | 1.65E-04                          | 5.06E-03                          | 1.78E-05                      | 1.29                          | 1.37E-06                   | 2.36E-03                       | 0.00                       | 0.45                        | 0.55                             |
| 8   | 1.62E-04                          | 4.97E-03                          | 1.78E-05                      | 1.51                          | 1.42E-06                   | 2.25E-03                       | 0.00                       | 0.43                        | 0.57                             |
| 7   | 1.59E-04                          | 4.88E-03                          | 1.78E-05                      | 1.75                          | 1.46E-06                   | 2.16E-03                       | 0.00                       | 0.41                        | 0.59                             |
| 8   | 1.56E-04                          | 4.78E-03                          | 1.79E-05                      | 2.01                          | 1.47E-06                   | 2.08E-03                       | 0.00                       | 0.40                        | 0.60                             |

**Table S13:** sample composition for the determination of ionic strength effects for the complexation of Np(V) with  $\text{Ox}^{2-}$  as a function of  $I_m(\text{NaClO}_4)$  at  $T = 60^\circ\text{C}$  and species distribution obtained by principle component analyses of the absorption spectra.

| Nr. | total concentrations              |                                   |                               | $I_m$<br>( $\text{NaClO}_4$ ) | eq. concentration          |                                | species fractions $\chi_i$ |                             |                                  |
|-----|-----------------------------------|-----------------------------------|-------------------------------|-------------------------------|----------------------------|--------------------------------|----------------------------|-----------------------------|----------------------------------|
|     | $[\text{NpO}_2^+]_{\text{total}}$ | $[\text{Ox}^{2-}]_{\text{total}}$ | $[\text{H}^+]_{\text{total}}$ |                               | $[\text{H}^+]_{\text{eq}}$ | $[\text{Ox}^{2-}]_{\text{eq}}$ | $\text{NpO}_2^+$           | $\text{NpO}_2(\text{Ox})^-$ | $\text{NpO}_2(\text{Ox})_2^{3-}$ |
| 1   | 1.75E-04                          | 5.36E-03                          | 1.78E-05                      | 0.49                          | 8.69E-07                   | 3.00E-03                       | 0.02                       | 0.57                        | 0.41                             |
| 2   | 1.73E-04                          | 5.29E-03                          | 1.78E-05                      | 0.68                          | 1.01E-06                   | 2.76E-03                       | 0.02                       | 0.54                        | 0.44                             |
| 3   | 1.70E-04                          | 5.22E-03                          | 1.78E-05                      | 0.87                          | 1.12E-06                   | 2.58E-03                       | 0.02                       | 0.52                        | 0.46                             |
| 4   | 1.68E-04                          | 5.14E-03                          | 1.78E-05                      | 1.07                          | 1.21E-06                   | 2.43E-03                       | 0.02                       | 0.51                        | 0.47                             |
| 5   | 1.65E-04                          | 5.06E-03                          | 1.78E-05                      | 1.29                          | 1.28E-06                   | 2.31E-03                       | 0.02                       | 0.48                        | 0.50                             |
| 8   | 1.62E-04                          | 4.97E-03                          | 1.78E-05                      | 1.51                          | 1.33E-06                   | 2.20E-03                       | 0.02                       | 0.46                        | 0.52                             |
| 7   | 1.59E-04                          | 4.88E-03                          | 1.78E-05                      | 1.75                          | 1.36E-06                   | 2.11E-03                       | 0.02                       | 0.45                        | 0.53                             |
| 8   | 1.56E-04                          | 4.78E-03                          | 1.79E-05                      | 2.01                          | 1.37E-06                   | 2.03E-03                       | 0.02                       | 0.43                        | 0.55                             |

**Table S14:** sample composition for the determination of ionic strength effects for the complexation of Np(V) with  $\text{Ox}^{2-}$  as a function of  $I_m(\text{NaClO}_4)$  at  $T = 70^\circ\text{C}$  and species distribution obtained by principle component analyses of the absorption spectra.

| Nr. | total concentrations              |                                   |                               | $I_m$<br>( $\text{NaClO}_4$ ) | eq. concentration          |                                | species fractions $\chi_i$ |                             |                                  |
|-----|-----------------------------------|-----------------------------------|-------------------------------|-------------------------------|----------------------------|--------------------------------|----------------------------|-----------------------------|----------------------------------|
|     | $[\text{NpO}_2^+]_{\text{total}}$ | $[\text{Ox}^{2-}]_{\text{total}}$ | $[\text{H}^+]_{\text{total}}$ |                               | $[\text{H}^+]_{\text{eq}}$ | $[\text{Ox}^{2-}]_{\text{eq}}$ | $\text{NpO}_2^+$           | $\text{NpO}_2(\text{Ox})^-$ | $\text{NpO}_2(\text{Ox})_2^{3-}$ |
| 1   | 1.75E-04                          | 5.36E-03                          | 1.78E-05                      | 0.49                          | 7.93E-07                   | 2.93E-03                       | 0.02                       | 0.59                        | 0.39                             |
| 2   | 1.73E-04                          | 5.29E-03                          | 1.78E-05                      | 0.68                          | 9.27E-07                   | 2.69E-03                       | 0.02                       | 0.56                        | 0.42                             |
| 3   | 1.70E-04                          | 5.22E-03                          | 1.78E-05                      | 0.87                          | 1.03E-06                   | 2.51E-03                       | 0.02                       | 0.54                        | 0.44                             |
| 4   | 1.68E-04                          | 5.14E-03                          | 1.78E-05                      | 1.07                          | 1.11E-06                   | 2.37E-03                       | 0.02                       | 0.52                        | 0.46                             |
| 5   | 1.65E-04                          | 5.06E-03                          | 1.78E-05                      | 1.29                          | 1.18E-06                   | 2.25E-03                       | 0.02                       | 0.50                        | 0.48                             |
| 8   | 1.62E-04                          | 4.97E-03                          | 1.78E-05                      | 1.51                          | 1.22E-06                   | 2.15E-03                       | 0.02                       | 0.48                        | 0.49                             |
| 7   | 1.59E-04                          | 4.88E-03                          | 1.78E-05                      | 1.75                          | 1.25E-06                   | 2.06E-03                       | 0.02                       | 0.46                        | 0.52                             |
| 8   | 1.56E-04                          | 4.78E-03                          | 1.79E-05                      | 2.01                          | 1.27E-06                   | 1.97E-03                       | 0.02                       | 0.46                        | 0.52                             |

**Table S15:** sample composition for the determination of ionic strength effects for the complexation of Np(V) with  $\text{Ox}^{2-}$  as a function of  $I_m(\text{NaClO}_4)$  at  $T = 80^\circ\text{C}$  and species distribution obtained by principle component analyses of the absorption spectra.

| Nr. | total concentrations              |                                   |                               | $I_m$<br>( $\text{NaClO}_4$ ) | eq. concentration          |                                | species fractions $\chi_i$ |                             |                                  |
|-----|-----------------------------------|-----------------------------------|-------------------------------|-------------------------------|----------------------------|--------------------------------|----------------------------|-----------------------------|----------------------------------|
|     | $[\text{NpO}_2^+]_{\text{total}}$ | $[\text{Ox}^{2-}]_{\text{total}}$ | $[\text{H}^+]_{\text{total}}$ |                               | $[\text{H}^+]_{\text{eq}}$ | $[\text{Ox}^{2-}]_{\text{eq}}$ | $\text{NpO}_2^+$           | $\text{NpO}_2(\text{Ox})^-$ | $\text{NpO}_2(\text{Ox})_2^{3-}$ |
| 1   | 1.75E-04                          | 5.36E-03                          | 1.78E-05                      | 0.49                          | 7.21E-07                   | 2.87E-03                       | 0.02                       | 0.60                        | 0.38                             |
| 2   | 1.73E-04                          | 5.29E-03                          | 1.78E-05                      | 0.68                          | 8.45E-07                   | 2.63E-03                       | 0.02                       | 0.58                        | 0.40                             |
| 3   | 1.70E-04                          | 5.22E-03                          | 1.78E-05                      | 0.87                          | 9.42E-07                   | 2.46E-03                       | 0.02                       | 0.57                        | 0.41                             |
| 4   | 1.68E-04                          | 5.14E-03                          | 1.78E-05                      | 1.07                          | 1.02E-06                   | 2.32E-03                       | 0.02                       | 0.54                        | 0.44                             |
| 5   | 1.65E-04                          | 5.06E-03                          | 1.78E-05                      | 1.29                          | 1.08E-06                   | 2.20E-03                       | 0.03                       | 0.52                        | 0.45                             |
| 8   | 1.62E-04                          | 4.97E-03                          | 1.78E-05                      | 1.51                          | 1.13E-06                   | 2.10E-03                       | 0.03                       | 0.51                        | 0.46                             |
| 7   | 1.59E-04                          | 4.88E-03                          | 1.78E-05                      | 1.75                          | 1.15E-06                   | 2.01E-03                       | 0.03                       | 0.48                        | 0.48                             |
| 8   | 1.56E-04                          | 4.78E-03                          | 1.79E-05                      | 2.01                          | 1.17E-06                   | 1.94E-03                       | 0.03                       | 0.47                        | 0.49                             |

**Table S16:** sample composition for the determination of ionic strength effects for the complexation of Np(V) with  $\text{Ox}^{2-}$  as a function of  $I_m(\text{NaClO}_4)$  at  $T = 85^\circ\text{C}$  and species distribution obtained by principle component analyses of the absorption spectra.

| Nr. | total concentrations              |                                   |                               | $I_m$<br>( $\text{NaClO}_4$ ) | eq. concentration          |                                | species fractions $\chi_i$ |                             |                                  |
|-----|-----------------------------------|-----------------------------------|-------------------------------|-------------------------------|----------------------------|--------------------------------|----------------------------|-----------------------------|----------------------------------|
|     | $[\text{NpO}_2^+]_{\text{total}}$ | $[\text{Ox}^{2-}]_{\text{total}}$ | $[\text{H}^+]_{\text{total}}$ |                               | $[\text{H}^+]_{\text{eq}}$ | $[\text{Ox}^{2-}]_{\text{eq}}$ | $\text{NpO}_2^+$           | $\text{NpO}_2(\text{Ox})^-$ | $\text{NpO}_2(\text{Ox})_2^{3-}$ |
| 1   | 1.75E-04                          | 5.36E-03                          | 1.78E-05                      | 0.49                          | 6.69E-07                   | 2.77E-03                       | 0.03                       | 0.61                        | 0.37                             |
| 2   | 1.73E-04                          | 5.29E-03                          | 1.78E-05                      | 0.68                          | 7.86E-07                   | 2.54E-03                       | 0.03                       | 0.59                        | 0.38                             |
| 3   | 1.70E-04                          | 5.22E-03                          | 1.78E-05                      | 0.87                          | 8.77E-07                   | 2.36E-03                       | 0.03                       | 0.57                        | 0.40                             |
| 4   | 1.68E-04                          | 5.14E-03                          | 1.78E-05                      | 1.07                          | 9.51E-07                   | 2.22E-03                       | 0.03                       | 0.55                        | 0.42                             |
| 5   | 1.65E-04                          | 5.06E-03                          | 1.78E-05                      | 1.29                          | 1.01E-06                   | 2.10E-03                       | 0.03                       | 0.54                        | 0.43                             |
| 8   | 1.62E-04                          | 4.97E-03                          | 1.78E-05                      | 1.51                          | 1.05E-06                   | 2.00E-03                       | 0.03                       | 0.52                        | 0.45                             |
| 7   | 1.59E-04                          | 4.88E-03                          | 1.78E-05                      | 1.75                          | 1.08E-06                   | 1.92E-03                       | 0.03                       | 0.51                        | 0.46                             |
| 8   | 1.56E-04                          | 4.78E-03                          | 1.79E-05                      | 2.01                          | 1.09E-06                   | 1.84E-03                       | 0.03                       | 0.50                        | 0.47                             |

**Table S17:** sample composition for the determination of ionic strength effects for the complexation of Np(V) with  $\text{Ox}^{2-}$  as a function of  $I_m(\text{NaClO}_4)$  at  $T = 20^\circ\text{C}$  and species distribution obtained by principle component analyses of the absorption spectra.

| Nr. | total concentrations              |                                   |                               | $I_m$<br>( $\text{NaClO}_4$ ) | eq. concentration          |                                | species fractions $\chi_i$ |                             |                                  |
|-----|-----------------------------------|-----------------------------------|-------------------------------|-------------------------------|----------------------------|--------------------------------|----------------------------|-----------------------------|----------------------------------|
|     | $[\text{NpO}_2^+]_{\text{total}}$ | $[\text{Ox}^{2-}]_{\text{total}}$ | $[\text{H}^+]_{\text{total}}$ |                               | $[\text{H}^+]_{\text{eq}}$ | $[\text{Ox}^{2-}]_{\text{eq}}$ | $\text{NpO}_2^+$           | $\text{NpO}_2(\text{Ox})^-$ | $\text{NpO}_2(\text{Ox})_2^{3-}$ |
| 1   | 1.75E-04                          | 3.22E-04                          | 1.79E-05                      | 0.53                          | 9.82E-06                   | 1.88E-04                       | 0.51                       | 0.49                        | 0.00                             |
| 2   | 1.73E-04                          | 3.22E-04                          | 1.79E-05                      | 0.71                          | 1.03E-05                   | 1.77E-04                       | 0.51                       | 0.49                        | 0.00                             |
| 3   | 1.71E-04                          | 3.22E-04                          | 1.79E-05                      | 0.90                          | 1.07E-05                   | 1.69E-04                       | 0.50                       | 0.50                        | 0.00                             |
| 4   | 1.68E-04                          | 3.22E-04                          | 1.79E-05                      | 1.10                          | 1.09E-05                   | 1.63E-04                       | 0.49                       | 0.50                        | 0.01                             |
| 5   | 1.65E-04                          | 3.22E-04                          | 1.78E-05                      | 1.31                          | 1.10E-05                   | 1.57E-04                       | 0.47                       | 0.51                        | 0.02                             |
| 8   | 1.62E-04                          | 3.22E-04                          | 1.78E-05                      | 1.53                          | 1.11E-05                   | 1.53E-04                       | 0.46                       | 0.51                        | 0.03                             |
| 7   | 1.59E-04                          | 3.22E-04                          | 1.78E-05                      | 1.76                          | 1.11E-05                   | 1.50E-04                       | 0.44                       | 0.53                        | 0.03                             |
| 8   | 1.56E-04                          | 3.22E-04                          | 1.77E-05                      | 2.01                          | 1.10E-05                   | 1.47E-04                       | 0.43                       | 0.54                        | 0.03                             |

**Table S18:** sample composition for the determination of ionic strength effects for the complexation of Np(V) with  $\text{Ox}^{2-}$  as a function of  $I_m(\text{NaClO}_4)$  at  $T = 30\text{ }^\circ\text{C}$  and species distribution obtained by principle component analyses of the absorption spectra.

| Nr. | total concentrations              |                                   |                               | $I_m$<br>( $\text{NaClO}_4$ ) | eq. concentration          |                                | species fractions $\chi_i$ |                             |                                  |
|-----|-----------------------------------|-----------------------------------|-------------------------------|-------------------------------|----------------------------|--------------------------------|----------------------------|-----------------------------|----------------------------------|
|     | $[\text{NpO}_2^+]_{\text{total}}$ | $[\text{Ox}^{2-}]_{\text{total}}$ | $[\text{H}^+]_{\text{total}}$ |                               | $[\text{H}^+]_{\text{eq}}$ | $[\text{Ox}^{2-}]_{\text{eq}}$ | $\text{NpO}_2^+$           | $\text{NpO}_2(\text{Ox})^-$ | $\text{NpO}_2(\text{Ox})_2^{3-}$ |
| 1   | 1.75E-04                          | 3.22E-04                          | 1.79E-05                      | 0.53                          | 9.56E-06                   | 1.85E-04                       | 0.52                       | 0.48                        | 0.00                             |
| 2   | 1.73E-04                          | 3.22E-04                          | 1.79E-05                      | 0.71                          | 1.01E-05                   | 1.74E-04                       | 0.53                       | 0.47                        | 0.00                             |
| 3   | 1.71E-04                          | 3.22E-04                          | 1.79E-05                      | 0.90                          | 1.04E-05                   | 1.66E-04                       | 0.51                       | 0.48                        | 0.01                             |
| 4   | 1.68E-04                          | 3.22E-04                          | 1.79E-05                      | 1.10                          | 1.07E-05                   | 1.60E-04                       | 0.50                       | 0.49                        | 0.01                             |
| 5   | 1.65E-04                          | 3.22E-04                          | 1.78E-05                      | 1.31                          | 1.08E-05                   | 1.54E-04                       | 0.49                       | 0.49                        | 0.02                             |
| 8   | 1.62E-04                          | 3.22E-04                          | 1.78E-05                      | 1.53                          | 1.09E-05                   | 1.50E-04                       | 0.47                       | 0.50                        | 0.03                             |
| 7   | 1.59E-04                          | 3.22E-04                          | 1.78E-05                      | 1.76                          | 1.08E-05                   | 1.47E-04                       | 0.46                       | 0.51                        | 0.03                             |
| 8   | 1.56E-04                          | 3.22E-04                          | 1.77E-05                      | 2.01                          | 1.08E-05                   | 1.44E-04                       | 0.44                       | 0.52                        | 0.04                             |

**Table S19:** sample composition for the determination of ionic strength effects for the complexation of Np(V) with  $\text{Ox}^{2-}$  as a function of  $I_m(\text{NaClO}_4)$  at  $T = 40\text{ }^\circ\text{C}$  and species distribution obtained by principle component analyses of the absorption spectra.

| Nr. | total concentrations              |                                   |                               | $I_m$<br>( $\text{NaClO}_4$ ) | eq. concentration          |                                | species fractions $\chi_i$ |                             |                                  |
|-----|-----------------------------------|-----------------------------------|-------------------------------|-------------------------------|----------------------------|--------------------------------|----------------------------|-----------------------------|----------------------------------|
|     | $[\text{NpO}_2^+]_{\text{total}}$ | $[\text{Ox}^{2-}]_{\text{total}}$ | $[\text{H}^+]_{\text{total}}$ |                               | $[\text{H}^+]_{\text{eq}}$ | $[\text{Ox}^{2-}]_{\text{eq}}$ | $\text{NpO}_2^+$           | $\text{NpO}_2(\text{Ox})^-$ | $\text{NpO}_2(\text{Ox})_2^{3-}$ |
| 1   | 1.75E-04                          | 3.22E-04                          | 1.79E-05                      | 0.53                          | 9.24E-06                   | 1.81E-04                       | 0.53                       | 0.47                        | 0.00                             |
| 2   | 1.73E-04                          | 3.22E-04                          | 1.79E-05                      | 0.71                          | 9.79E-06                   | 1.70E-04                       | 0.53                       | 0.47                        | 0.00                             |
| 3   | 1.71E-04                          | 3.22E-04                          | 1.79E-05                      | 0.90                          | 1.01E-05                   | 1.62E-04                       | 0.53                       | 0.47                        | 0.00                             |
| 4   | 1.68E-04                          | 3.22E-04                          | 1.79E-05                      | 1.10                          | 1.04E-05                   | 1.56E-04                       | 0.51                       | 0.48                        | 0.01                             |
| 5   | 1.65E-04                          | 3.22E-04                          | 1.78E-05                      | 1.31                          | 1.05E-05                   | 1.51E-04                       | 0.51                       | 0.48                        | 0.01                             |
| 8   | 1.62E-04                          | 3.22E-04                          | 1.78E-05                      | 1.53                          | 1.06E-05                   | 1.46E-04                       | 0.48                       | 0.49                        | 0.02                             |
| 7   | 1.59E-04                          | 3.22E-04                          | 1.78E-05                      | 1.76                          | 1.06E-05                   | 1.43E-04                       | 0.48                       | 0.50                        | 0.02                             |
| 8   | 1.56E-04                          | 3.22E-04                          | 1.77E-05                      | 2.01                          | 1.05E-05                   | 1.40E-04                       | 0.45                       | 0.52                        | 0.03                             |

**Table S20:** sample composition for the determination of ionic strength effects for the complexation of Np(V) with  $\text{Ox}^{2-}$  as a function of  $I_m(\text{NaClO}_4)$  at  $T = 50\text{ }^\circ\text{C}$  and species distribution obtained by principle component analyses of the absorption spectra.

| Nr. | total concentrations              |                                   |                               | $I_m$<br>( $\text{NaClO}_4$ ) | eq. concentration          |                                | species fractions $\chi_i$ |                             |                                  |
|-----|-----------------------------------|-----------------------------------|-------------------------------|-------------------------------|----------------------------|--------------------------------|----------------------------|-----------------------------|----------------------------------|
|     | $[\text{NpO}_2^+]_{\text{total}}$ | $[\text{Ox}^{2-}]_{\text{total}}$ | $[\text{H}^+]_{\text{total}}$ |                               | $[\text{H}^+]_{\text{eq}}$ | $[\text{Ox}^{2-}]_{\text{eq}}$ | $\text{NpO}_2^+$           | $\text{NpO}_2(\text{Ox})^-$ | $\text{NpO}_2(\text{Ox})_2^{3-}$ |
| 1   | 1.75E-04                          | 3.22E-04                          | 1.79E-05                      | 0.53                          | 8.90E-06                   | 1.77E-04                       | 0.55                       | 0.45                        | 0.00                             |
| 2   | 1.73E-04                          | 3.22E-04                          | 1.79E-05                      | 0.71                          | 9.46E-06                   | 1.66E-04                       | 0.54                       | 0.46                        | 0.00                             |
| 3   | 1.71E-04                          | 3.22E-04                          | 1.79E-05                      | 0.90                          | 9.83E-06                   | 1.58E-04                       | 0.54                       | 0.46                        | 0.00                             |
| 4   | 1.68E-04                          | 3.22E-04                          | 1.79E-05                      | 1.10                          | 1.01E-05                   | 1.52E-04                       | 0.53                       | 0.46                        | 0.01                             |
| 5   | 1.65E-04                          | 3.22E-04                          | 1.78E-05                      | 1.31                          | 1.02E-05                   | 1.47E-04                       | 0.52                       | 0.47                        | 0.01                             |
| 8   | 1.62E-04                          | 3.22E-04                          | 1.78E-05                      | 1.53                          | 1.03E-05                   | 1.43E-04                       | 0.50                       | 0.47                        | 0.03                             |
| 7   | 1.59E-04                          | 3.22E-04                          | 1.78E-05                      | 1.76                          | 1.03E-05                   | 1.40E-04                       | 0.49                       | 0.49                        | 0.02                             |
| 8   | 1.56E-04                          | 3.22E-04                          | 1.77E-05                      | 2.01                          | 1.02E-05                   | 1.37E-04                       | 0.47                       | 0.50                        | 0.03                             |



**Table S21** sample composition for the determination of ionic strength effects for the complexation of Np(V) with  $\text{Ox}^{2-}$  as a function of  $I_m(\text{NaClO}_4)$  at  $T = 60^\circ\text{C}$  and species distribution obtained by principle component analyses of the absorption spectra.

| Nr. | total concentrations              |                                   |                               | $I_m$<br>( $\text{NaClO}_4$ ) | eq. concentration          |                                | species fractions $\chi_i$ |                             |                                  |
|-----|-----------------------------------|-----------------------------------|-------------------------------|-------------------------------|----------------------------|--------------------------------|----------------------------|-----------------------------|----------------------------------|
|     | $[\text{NpO}_2^+]_{\text{total}}$ | $[\text{Ox}^{2-}]_{\text{total}}$ | $[\text{H}^+]_{\text{total}}$ |                               | $[\text{H}^+]_{\text{eq}}$ | $[\text{Ox}^{2-}]_{\text{eq}}$ | $\text{NpO}_2^+$           | $\text{NpO}_2(\text{Ox})^-$ | $\text{NpO}_2(\text{Ox})_2^{3-}$ |
| 1   | 1.75E-04                          | 3.22E-04                          | 1.79E-05                      | 0.53                          | 8.52E-06                   | 1.73E-04                       | 0.58                       | 0.42                        | 0.00                             |
| 2   | 1.73E-04                          | 3.22E-04                          | 1.79E-05                      | 0.71                          | 9.10E-06                   | 1.62E-04                       | 0.58                       | 0.42                        | 0.00                             |
| 3   | 1.71E-04                          | 3.22E-04                          | 1.79E-05                      | 0.90                          | 9.47E-06                   | 1.55E-04                       | 0.58                       | 0.42                        | 0.00                             |
| 4   | 1.68E-04                          | 3.22E-04                          | 1.79E-05                      | 1.10                          | 9.72E-06                   | 1.48E-04                       | 0.57                       | 0.43                        | 0.00                             |
| 5   | 1.65E-04                          | 3.22E-04                          | 1.78E-05                      | 1.31                          | 9.88E-06                   | 1.43E-04                       | 0.56                       | 0.43                        | 0.01                             |
| 8   | 1.62E-04                          | 3.22E-04                          | 1.78E-05                      | 1.53                          | 9.95E-06                   | 1.39E-04                       | 0.54                       | 0.44                        | 0.02                             |
| 7   | 1.59E-04                          | 3.22E-04                          | 1.78E-05                      | 1.76                          | 9.96E-06                   | 1.36E-04                       | 0.54                       | 0.44                        | 0.02                             |
| 8   | 1.56E-04                          | 3.22E-04                          | 1.77E-05                      | 2.01                          | 9.91E-06                   | 1.34E-04                       | 0.53                       | 0.46                        | 0.01                             |

**Table S22:** sample composition for the determination of ionic strength effects for the complexation of Np(V) with  $\text{Ox}^{2-}$  as a function of  $I_m(\text{NaClO}_4)$  at  $T = 70^\circ\text{C}$  and species distribution obtained by principle component analyses of the absorption spectra.

| Nr. | total concentrations              |                                   |                               | $I_m$<br>( $\text{NaClO}_4$ ) | eq. concentration          |                                | species fractions $\chi_i$ |                             |                                  |
|-----|-----------------------------------|-----------------------------------|-------------------------------|-------------------------------|----------------------------|--------------------------------|----------------------------|-----------------------------|----------------------------------|
|     | $[\text{NpO}_2^+]_{\text{total}}$ | $[\text{Ox}^{2-}]_{\text{total}}$ | $[\text{H}^+]_{\text{total}}$ |                               | $[\text{H}^+]_{\text{eq}}$ | $[\text{Ox}^{2-}]_{\text{eq}}$ | $\text{NpO}_2^+$           | $\text{NpO}_2(\text{Ox})^-$ | $\text{NpO}_2(\text{Ox})_2^{3-}$ |
| 1   | 1.75E-04                          | 3.22E-04                          | 1.79E-05                      | 0.53                          | 8.11E-06                   | 1.69E-04                       | 0.59                       | 0.41                        | 0.00                             |
| 2   | 1.73E-04                          | 3.22E-04                          | 1.79E-05                      | 0.71                          | 8.69E-06                   | 1.58E-04                       | 0.59                       | 0.41                        | 0.00                             |
| 3   | 1.71E-04                          | 3.22E-04                          | 1.79E-05                      | 0.90                          | 9.08E-06                   | 1.50E-04                       | 0.59                       | 0.41                        | 0.00                             |
| 4   | 1.68E-04                          | 3.22E-04                          | 1.79E-05                      | 1.10                          | 9.33E-06                   | 1.44E-04                       | 0.59                       | 0.41                        | 0.00                             |
| 5   | 1.65E-04                          | 3.22E-04                          | 1.78E-05                      | 1.31                          | 9.50E-06                   | 1.40E-04                       | 0.57                       | 0.42                        | 0.01                             |
| 8   | 1.62E-04                          | 3.22E-04                          | 1.78E-05                      | 1.53                          | 9.58E-06                   | 1.36E-04                       | 0.55                       | 0.43                        | 0.02                             |
| 7   | 1.59E-04                          | 3.22E-04                          | 1.78E-05                      | 1.76                          | 9.59E-06                   | 1.33E-04                       | 0.55                       | 0.44                        | 0.01                             |
| 8   | 1.56E-04                          | 3.22E-04                          | 1.77E-05                      | 2.01                          | 9.54E-06                   | 1.30E-04                       | 0.54                       | 0.45                        | 0.01                             |

**Table S23:** sample composition for the determination of ionic strength effects for the complexation of Np(V) with  $\text{Ox}^{2-}$  as a function of  $I_m(\text{NaClO}_4)$  at  $T = 80^\circ\text{C}$  and species distribution obtained by principle component analyses of the absorption spectra.

| Nr. | total concentrations              |                                   |                               | $I_m$<br>( $\text{NaClO}_4$ ) | eq. concentration          |                                | species fractions $\chi_i$ |                             |                                  |
|-----|-----------------------------------|-----------------------------------|-------------------------------|-------------------------------|----------------------------|--------------------------------|----------------------------|-----------------------------|----------------------------------|
|     | $[\text{NpO}_2^+]_{\text{total}}$ | $[\text{Ox}^{2-}]_{\text{total}}$ | $[\text{H}^+]_{\text{total}}$ |                               | $[\text{H}^+]_{\text{eq}}$ | $[\text{Ox}^{2-}]_{\text{eq}}$ | $\text{NpO}_2^+$           | $\text{NpO}_2(\text{Ox})^-$ | $\text{NpO}_2(\text{Ox})_2^{3-}$ |
| 1   | 1.75E-04                          | 3.22E-04                          | 1.79E-05                      | 0.53                          | 7.67E-06                   | 1.65E-04                       | 0.60                       | 0.40                        | 0.00                             |
| 2   | 1.73E-04                          | 3.22E-04                          | 1.79E-05                      | 0.71                          | 8.27E-06                   | 1.55E-04                       | 0.61                       | 0.39                        | 0.00                             |
| 3   | 1.71E-04                          | 3.22E-04                          | 1.79E-05                      | 0.90                          | 8.66E-06                   | 1.47E-04                       | 0.59                       | 0.40                        | 0.01                             |
| 4   | 1.68E-04                          | 3.22E-04                          | 1.79E-05                      | 1.10                          | 8.93E-06                   | 1.41E-04                       | 0.59                       | 0.40                        | 0.01                             |
| 5   | 1.65E-04                          | 3.22E-04                          | 1.78E-05                      | 1.31                          | 9.10E-06                   | 1.36E-04                       | 0.59                       | 0.40                        | 0.01                             |
| 8   | 1.62E-04                          | 3.22E-04                          | 1.78E-05                      | 1.53                          | 9.18E-06                   | 1.33E-04                       | 0.56                       | 0.42                        | 0.02                             |
| 7   | 1.59E-04                          | 3.22E-04                          | 1.78E-05                      | 1.76                          | 9.20E-06                   | 1.30E-04                       | 0.56                       | 0.42                        | 0.02                             |
| 8   | 1.56E-04                          | 3.22E-04                          | 1.77E-05                      | 2.01                          | 9.15E-06                   | 1.27E-04                       | 0.54                       | 0.44                        | 0.02                             |

**Table S24:** sample composition for the determination of ionic strength effects for the complexation of Np(V) with  $\text{Ox}^{2-}$  as a function of  $I_m(\text{NaClO}_4)$  at  $T = 85^\circ\text{C}$  and species distribution obtained by principle component analyses of the absorption spectra.

| Nr. | total concentrations              |                                   |                               | $I_m$<br>( $\text{NaClO}_4$ ) | eq. concentration          |                                | species fractions $\chi_i$ |                             |                                  |
|-----|-----------------------------------|-----------------------------------|-------------------------------|-------------------------------|----------------------------|--------------------------------|----------------------------|-----------------------------|----------------------------------|
|     | $[\text{NpO}_2^+]_{\text{total}}$ | $[\text{Ox}^{2-}]_{\text{total}}$ | $[\text{H}^+]_{\text{total}}$ |                               | $[\text{H}^+]_{\text{eq}}$ | $[\text{Ox}^{2-}]_{\text{eq}}$ | $\text{NpO}_2^+$           | $\text{NpO}_2(\text{Ox})^-$ | $\text{NpO}_2(\text{Ox})_2^{3-}$ |
| 1   | 1.75E-04                          | 3.22E-04                          | 1.79E-05                      | 0.53                          | 7.34E-06                   | 1.59E-04                       | 0.60                       | 0.40                        | 0.00                             |
| 2   | 1.73E-04                          | 3.22E-04                          | 1.79E-05                      | 0.71                          | 7.93E-06                   | 1.49E-04                       | 0.60                       | 0.40                        | 0.00                             |
| 3   | 1.71E-04                          | 3.22E-04                          | 1.79E-05                      | 0.90                          | 8.33E-06                   | 1.41E-04                       | 0.59                       | 0.40                        | 0.01                             |
| 4   | 1.68E-04                          | 3.22E-04                          | 1.79E-05                      | 1.10                          | 8.60E-06                   | 1.35E-04                       | 0.59                       | 0.40                        | 0.01                             |
| 5   | 1.65E-04                          | 3.22E-04                          | 1.78E-05                      | 1.31                          | 8.77E-06                   | 1.30E-04                       | 0.58                       | 0.40                        | 0.02                             |
| 8   | 1.62E-04                          | 3.22E-04                          | 1.78E-05                      | 1.53                          | 8.86E-06                   | 1.26E-04                       | 0.57                       | 0.40                        | 0.03                             |
| 7   | 1.59E-04                          | 3.22E-04                          | 1.78E-05                      | 1.76                          | 8.88E-06                   | 1.23E-04                       | 0.55                       | 0.42                        | 0.03                             |
| 8   | 1.56E-04                          | 3.22E-04                          | 1.77E-05                      | 2.01                          | 8.83E-06                   | 1.21E-04                       | 0.55                       | 0.42                        | 0.03                             |

Used background electrolyte: NaCl

**Table S25:** sample composition for the determination of ionic strength effects for the complexation of Np(V) with  $\text{Ox}^{2-}$  as a function of  $I_m(\text{NaCl})$  at  $T = 20^\circ\text{C}$  and species distribution obtained by principle component analyses of the absorption spectra.

| Nr. | total concentrations              |                                   |                               | $I_m$<br>( $\text{NaCl}$ ) | eq. concentration          |                                | species fractions $\chi_i$ |                             |                                  |
|-----|-----------------------------------|-----------------------------------|-------------------------------|----------------------------|----------------------------|--------------------------------|----------------------------|-----------------------------|----------------------------------|
|     | $[\text{NpO}_2^+]_{\text{total}}$ | $[\text{Ox}^{2-}]_{\text{total}}$ | $[\text{H}^+]_{\text{total}}$ |                            | $[\text{H}^+]_{\text{eq}}$ | $[\text{Ox}^{2-}]_{\text{eq}}$ | $\text{NpO}_2^+$           | $\text{NpO}_2(\text{Ox})^-$ | $\text{NpO}_2(\text{Ox})_2^{3-}$ |
| 1   | 1.65E-04                          | 5.28E-03                          | 1.97E-05                      | 0.48                       | 1.32E-06                   | 3.18E-03                       | 0.01                       | 0.49                        | 0.49                             |
| 2   | 1.65E-04                          | 5.28E-03                          | 1.97E-05                      | 0.92                       | 1.71E-06                   | 2.76E-03                       | 0.01                       | 0.52                        | 0.47                             |
| 3   | 1.65E-04                          | 5.28E-03                          | 1.97E-05                      | 1.42                       | 1.92E-06                   | 2.50E-03                       | 0.01                       | 0.49                        | 0.50                             |
| 4   | 1.65E-04                          | 5.28E-03                          | 1.97E-05                      | 1.89                       | 1.99E-06                   | 2.36E-03                       | 0.01                       | 0.50                        | 0.49                             |
| 5   | 1.65E-04                          | 5.28E-03                          | 1.97E-05                      | 2.36                       | 1.98E-06                   | 2.26E-03                       | 0.02                       | 0.49                        | 0.49                             |
| 8   | 1.65E-04                          | 5.28E-03                          | 1.97E-05                      | 2.85                       | 1.92E-06                   | 2.20E-03                       | 0.02                       | 0.47                        | 0.51                             |
| 7   | 1.65E-04                          | 5.28E-03                          | 1.97E-05                      | 3.34                       | 1.82E-06                   | 2.16E-03                       | 0.01                       | 0.45                        | 0.54                             |
| 8   | 1.65E-04                          | 5.28E-03                          | 1.97E-05                      | 3.87                       | 1.69E-06                   | 2.14E-03                       | 0.01                       | 0.42                        | 0.57                             |

**Table S26:** sample composition for the determination of ionic strength effects for the complexation of Np(V) with  $\text{Ox}^{2-}$  as a function of  $I_m(\text{NaCl})$  at  $T = 30^\circ\text{C}$  and species distribution obtained by principle component analyses of the absorption spectra.

| Nr. | total concentrations              |                                   |                               | $I_m$<br>( $\text{NaCl}$ ) | eq. concentration          |                                | species fractions $\chi_i$ |                             |                                  |
|-----|-----------------------------------|-----------------------------------|-------------------------------|----------------------------|----------------------------|--------------------------------|----------------------------|-----------------------------|----------------------------------|
|     | $[\text{NpO}_2^+]_{\text{total}}$ | $[\text{Ox}^{2-}]_{\text{total}}$ | $[\text{H}^+]_{\text{total}}$ |                            | $[\text{H}^+]_{\text{eq}}$ | $[\text{Ox}^{2-}]_{\text{eq}}$ | $\text{NpO}_2^+$           | $\text{NpO}_2(\text{Ox})^-$ | $\text{NpO}_2(\text{Ox})_2^{3-}$ |
| 1   | 1.65E-04                          | 5.28E-03                          | 1.97E-05                      | 0.48                       | 1.34E-06                   | 3.28E-03                       | 0.00                       | 0.52                        | 0.48                             |
| 2   | 1.65E-04                          | 5.28E-03                          | 1.97E-05                      | 0.92                       | 1.74E-06                   | 2.89E-03                       | 0.01                       | 0.54                        | 0.45                             |
| 3   | 1.65E-04                          | 5.28E-03                          | 1.97E-05                      | 1.42                       | 1.96E-06                   | 2.65E-03                       | 0.01                       | 0.51                        | 0.48                             |
| 4   | 1.65E-04                          | 5.28E-03                          | 1.97E-05                      | 1.89                       | 2.03E-06                   | 2.52E-03                       | 0.01                       | 0.52                        | 0.47                             |
| 5   | 1.65E-04                          | 5.28E-03                          | 1.97E-05                      | 2.36                       | 2.02E-06                   | 2.43E-03                       | 0.01                       | 0.50                        | 0.49                             |
| 8   | 1.65E-04                          | 5.28E-03                          | 1.97E-05                      | 2.85                       | 1.96E-06                   | 2.37E-03                       | 0.01                       | 0.49                        | 0.50                             |
| 7   | 1.65E-04                          | 5.28E-03                          | 1.97E-05                      | 3.34                       | 1.86E-06                   | 2.34E-03                       | 0.01                       | 0.47                        | 0.52                             |
| 8   | 1.65E-04                          | 5.28E-03                          | 1.97E-05                      | 3.87                       | 1.73E-06                   | 2.32E-03                       | 0.01                       | 0.44                        | 0.55                             |

**Table S27:** sample composition for the determination of ionic strength effects for the complexation of Np(V) with  $\text{Ox}^{2-}$  as a function of  $I_m(\text{NaCl})$  at  $T = 40^\circ\text{C}$  and species distribution obtained by principle component analyses of the absorption spectra.

| Nr. | total concentrations              |                                   |                               | $I_m$<br>(NaCl) | eq. concentration          |                                | species fractions $\chi_i$ |                             |                                  |
|-----|-----------------------------------|-----------------------------------|-------------------------------|-----------------|----------------------------|--------------------------------|----------------------------|-----------------------------|----------------------------------|
|     | $[\text{NpO}_2^+]_{\text{total}}$ | $[\text{Ox}^{2-}]_{\text{total}}$ | $[\text{H}^+]_{\text{total}}$ |                 | $[\text{H}^+]_{\text{eq}}$ | $[\text{Ox}^{2-}]_{\text{eq}}$ | $\text{NpO}_2^+$           | $\text{NpO}_2(\text{Ox})^-$ | $\text{NpO}_2(\text{Ox})_2^{3-}$ |
| 1   | 1.65E-04                          | 5.28E-03                          | 1.97E-05                      | 0.48            | 1.24E-06                   | 3.19E-03                       | 0.00                       | 0.58                        | 0.42                             |
| 2   | 1.65E-04                          | 5.28E-03                          | 1.97E-05                      | 0.92            | 1.62E-06                   | 2.80E-03                       | 0.00                       | 0.60                        | 0.40                             |
| 3   | 1.65E-04                          | 5.28E-03                          | 1.97E-05                      | 1.42            | 1.83E-06                   | 2.55E-03                       | 0.01                       | 0.56                        | 0.43                             |
| 4   | 1.65E-04                          | 5.28E-03                          | 1.97E-05                      | 1.89            | 1.90E-06                   | 2.42E-03                       | 0.01                       | 0.58                        | 0.41                             |
| 5   | 1.65E-04                          | 5.28E-03                          | 1.97E-05                      | 2.36            | 1.89E-06                   | 2.33E-03                       | 0.01                       | 0.57                        | 0.42                             |
| 8   | 1.65E-04                          | 5.28E-03                          | 1.97E-05                      | 2.85            | 1.83E-06                   | 2.27E-03                       | 0.01                       | 0.56                        | 0.43                             |
| 7   | 1.65E-04                          | 5.28E-03                          | 1.97E-05                      | 3.34            | 1.74E-06                   | 2.24E-03                       | 0.01                       | 0.54                        | 0.45                             |
| 8   | 1.65E-04                          | 5.28E-03                          | 1.97E-05                      | 3.87            | 1.62E-06                   | 2.22E-03                       | 0.00                       | 0.52                        | 0.48                             |

**Table S28:** sample composition for the determination of ionic strength effects for the complexation of Np(V) with  $\text{Ox}^{2-}$  as a function of  $I_m(\text{NaCl})$  at  $T = 50^\circ\text{C}$  and species distribution obtained by principle component analyses of the absorption spectra.

| Nr. | total concentrations              |                                   |                               | $I_m$<br>(NaCl) | eq. concentration          |                                | species fractions $\chi_i$ |                             |                                  |
|-----|-----------------------------------|-----------------------------------|-------------------------------|-----------------|----------------------------|--------------------------------|----------------------------|-----------------------------|----------------------------------|
|     | $[\text{NpO}_2^+]_{\text{total}}$ | $[\text{Ox}^{2-}]_{\text{total}}$ | $[\text{H}^+]_{\text{total}}$ |                 | $[\text{H}^+]_{\text{eq}}$ | $[\text{Ox}^{2-}]_{\text{eq}}$ | $\text{NpO}_2^+$           | $\text{NpO}_2(\text{Ox})^-$ | $\text{NpO}_2(\text{Ox})_2^{3-}$ |
| 1   | 1.65E-04                          | 5.28E-03                          | 1.97E-05                      | 0.48            | 1.13E-06                   | 3.09E-03                       | 0.00                       | 0.56                        | 0.44                             |
| 2   | 1.65E-04                          | 5.28E-03                          | 1.97E-05                      | 0.92            | 1.49E-06                   | 2.69E-03                       | 0.00                       | 0.59                        | 0.41                             |
| 3   | 1.65E-04                          | 5.28E-03                          | 1.97E-05                      | 1.42            | 1.69E-06                   | 2.45E-03                       | 0.00                       | 0.56                        | 0.44                             |
| 4   | 1.65E-04                          | 5.28E-03                          | 1.97E-05                      | 1.89            | 1.76E-06                   | 2.32E-03                       | 0.00                       | 0.58                        | 0.42                             |
| 5   | 1.65E-04                          | 5.28E-03                          | 1.97E-05                      | 2.36            | 1.75E-06                   | 2.23E-03                       | 0.00                       | 0.57                        | 0.43                             |
| 8   | 1.65E-04                          | 5.28E-03                          | 1.97E-05                      | 2.85            | 1.70E-06                   | 2.17E-03                       | 0.00                       | 0.56                        | 0.44                             |
| 7   | 1.65E-04                          | 5.28E-03                          | 1.97E-05                      | 3.34            | 1.62E-06                   | 2.14E-03                       | 0.00                       | 0.55                        | 0.45                             |
| 8   | 1.65E-04                          | 5.28E-03                          | 1.97E-05                      | 3.87            | 1.50E-06                   | 2.12E-03                       | 0.00                       | 0.52                        | 0.48                             |

**Table S29:** sample composition for the determination of ionic strength effects for the complexation of Np(V) with  $\text{Ox}^{2-}$  as a function of  $I_m(\text{NaCl})$  at  $T = 60^\circ\text{C}$  and species distribution obtained by principle component analyses of the absorption spectra.

| Nr. | total concentrations              |                                   |                               | $I_m$<br>(NaCl) | eq. concentration          |                                | species fractions $\chi_i$ |                             |                                  |
|-----|-----------------------------------|-----------------------------------|-------------------------------|-----------------|----------------------------|--------------------------------|----------------------------|-----------------------------|----------------------------------|
|     | $[\text{NpO}_2^+]_{\text{total}}$ | $[\text{Ox}^{2-}]_{\text{total}}$ | $[\text{H}^+]_{\text{total}}$ |                 | $[\text{H}^+]_{\text{eq}}$ | $[\text{Ox}^{2-}]_{\text{eq}}$ | $\text{NpO}_2^+$           | $\text{NpO}_2(\text{Ox})^-$ | $\text{NpO}_2(\text{Ox})_2^{3-}$ |
| 1   | 1.65E-04                          | 5.28E-03                          | 1.97E-05                      | 0.48            | 1.02E-06                   | 2.99E-03                       | 0.01                       | 0.59                        | 0.40                             |
| 2   | 1.65E-04                          | 5.28E-03                          | 1.97E-05                      | 0.92            | 1.36E-06                   | 2.59E-03                       | 0.03                       | 0.60                        | 0.37                             |
| 3   | 1.65E-04                          | 5.28E-03                          | 1.97E-05                      | 1.42            | 1.55E-06                   | 2.35E-03                       | 0.03                       | 0.61                        | 0.36                             |
| 4   | 1.65E-04                          | 5.28E-03                          | 1.97E-05                      | 1.89            | 1.61E-06                   | 2.21E-03                       | 0.03                       | 0.60                        | 0.37                             |
| 5   | 1.65E-04                          | 5.28E-03                          | 1.97E-05                      | 2.36            | 1.61E-06                   | 2.13E-03                       | 0.03                       | 0.59                        | 0.37                             |
| 8   | 1.65E-04                          | 5.28E-03                          | 1.97E-05                      | 2.85            | 1.57E-06                   | 2.07E-03                       | 0.03                       | 0.59                        | 0.38                             |
| 7   | 1.65E-04                          | 5.28E-03                          | 1.97E-05                      | 3.34            | 1.49E-06                   | 2.04E-03                       | 0.03                       | 0.57                        | 0.40                             |
| 8   | 1.65E-04                          | 5.28E-03                          | 1.97E-05                      | 3.87            | 1.38E-06                   | 2.02E-03                       | 0.03                       | 0.56                        | 0.41                             |

**Table S30:** sample composition for the determination of ionic strength effects for the complexation of Np(V) with  $\text{Ox}^{2-}$  as a function of  $I_m(\text{NaCl})$  at  $T = 70^\circ\text{C}$  and species distribution obtained by principle component analyses of the absorption spectra.

| Nr. | total concentrations              |                                   |                               | $I_m$<br>(NaCl) | eq. concentration          |                                | species fractions $\chi_i$ |                             |                                  |
|-----|-----------------------------------|-----------------------------------|-------------------------------|-----------------|----------------------------|--------------------------------|----------------------------|-----------------------------|----------------------------------|
|     | $[\text{NpO}_2^+]_{\text{total}}$ | $[\text{Ox}^{2-}]_{\text{total}}$ | $[\text{H}^+]_{\text{total}}$ |                 | $[\text{H}^+]_{\text{eq}}$ | $[\text{Ox}^{2-}]_{\text{eq}}$ | $\text{NpO}_2^+$           | $\text{NpO}_2(\text{Ox})^-$ | $\text{NpO}_2(\text{Ox})_2^{3-}$ |
| 1   | 1.65E-04                          | 5.28E-03                          | 1.97E-05                      | 0.48            | 9.20E-07                   | 2.88E-03                       | 0.03                       | 0.60                        | 0.37                             |
| 2   | 1.65E-04                          | 5.28E-03                          | 1.97E-05                      | 0.92            | 1.23E-06                   | 2.48E-03                       | 0.03                       | 0.63                        | 0.34                             |
| 3   | 1.65E-04                          | 5.28E-03                          | 1.97E-05                      | 1.42            | 1.41E-06                   | 2.24E-03                       | 0.03                       | 0.64                        | 0.33                             |
| 4   | 1.65E-04                          | 5.28E-03                          | 1.97E-05                      | 1.89            | 1.47E-06                   | 2.11E-03                       | 0.03                       | 0.63                        | 0.34                             |
| 5   | 1.65E-04                          | 5.28E-03                          | 1.97E-05                      | 2.36            | 1.47E-06                   | 2.02E-03                       | 0.03                       | 0.62                        | 0.34                             |
| 8   | 1.65E-04                          | 5.28E-03                          | 1.97E-05                      | 2.85            | 1.43E-06                   | 1.97E-03                       | 0.03                       | 0.61                        | 0.36                             |
| 7   | 1.65E-04                          | 5.28E-03                          | 1.97E-05                      | 3.34            | 1.36E-06                   | 1.93E-03                       | 0.03                       | 0.61                        | 0.36                             |
| 8   | 1.65E-04                          | 5.28E-03                          | 1.97E-05                      | 3.87            | 1.26E-06                   | 1.91E-03                       | 0.03                       | 0.59                        | 0.38                             |

**Table S31:** sample composition for the determination of ionic strength effects for the complexation of Np(V) with  $\text{Ox}^{2-}$  as a function of  $I_m(\text{NaCl})$  at  $T = 80^\circ\text{C}$  and species distribution obtained by principle component analyses of the absorption spectra.

| Nr. | total concentrations              |                                   |                               | $I_m$<br>(NaCl) | eq. concentration          |                                | species fractions $\chi_i$ |                             |                                  |
|-----|-----------------------------------|-----------------------------------|-------------------------------|-----------------|----------------------------|--------------------------------|----------------------------|-----------------------------|----------------------------------|
|     | $[\text{NpO}_2^+]_{\text{total}}$ | $[\text{Ox}^{2-}]_{\text{total}}$ | $[\text{H}^+]_{\text{total}}$ |                 | $[\text{H}^+]_{\text{eq}}$ | $[\text{Ox}^{2-}]_{\text{eq}}$ | $\text{NpO}_2^+$           | $\text{NpO}_2(\text{Ox})^-$ | $\text{NpO}_2(\text{Ox})_2^{3-}$ |
| 1   | 1.65E-04                          | 5.28E-03                          | 1.97E-05                      | 0.48            | 8.19E-07                   | 2.76E-03                       | 0.03                       | 0.62                        | 0.35                             |
| 2   | 1.65E-04                          | 5.28E-03                          | 1.97E-05                      | 0.92            | 1.10E-06                   | 2.36E-03                       | 0.03                       | 0.66                        | 0.31                             |
| 3   | 1.65E-04                          | 5.28E-03                          | 1.97E-05                      | 1.42            | 1.27E-06                   | 2.12E-03                       | 0.03                       | 0.67                        | 0.30                             |
| 4   | 1.65E-04                          | 5.28E-03                          | 1.97E-05                      | 1.89            | 1.33E-06                   | 2.00E-03                       | 0.03                       | 0.66                        | 0.30                             |
| 5   | 1.65E-04                          | 5.28E-03                          | 1.97E-05                      | 2.36            | 1.33E-06                   | 1.91E-03                       | 0.05                       | 0.65                        | 0.29                             |
| 8   | 1.65E-04                          | 5.28E-03                          | 1.97E-05                      | 2.85            | 1.29E-06                   | 1.86E-03                       | 0.05                       | 0.63                        | 0.32                             |
| 7   | 1.65E-04                          | 5.28E-03                          | 1.97E-05                      | 3.34            | 1.23E-06                   | 1.83E-03                       | 0.06                       | 0.63                        | 0.32                             |
| 8   | 1.65E-04                          | 5.28E-03                          | 1.97E-05                      | 3.87            | 1.14E-06                   | 1.81E-03                       | 0.06                       | 0.61                        | 0.33                             |

**Table S32:** sample composition for the determination of ionic strength effects for the complexation of Np(V) with  $\text{Ox}^{2-}$  as a function of  $I_m(\text{NaCl})$  at  $T = 85^\circ\text{C}$  and species distribution obtained by principle component analyses of the absorption spectra.

| Nr. | total concentrations              |                                   |                               | $I_m$<br>(NaCl) | eq. concentration          |                                | species fractions $\chi_i$ |                             |                                  |
|-----|-----------------------------------|-----------------------------------|-------------------------------|-----------------|----------------------------|--------------------------------|----------------------------|-----------------------------|----------------------------------|
|     | $[\text{NpO}_2^+]_{\text{total}}$ | $[\text{Ox}^{2-}]_{\text{total}}$ | $[\text{H}^+]_{\text{total}}$ |                 | $[\text{H}^+]_{\text{eq}}$ | $[\text{Ox}^{2-}]_{\text{eq}}$ | $\text{NpO}_2^+$           | $\text{NpO}_2(\text{Ox})^-$ | $\text{NpO}_2(\text{Ox})_2^{3-}$ |
| 1   | 1.65E-04                          | 5.28E-03                          | 1.97E-05                      | 0.48            | 7.70E-07                   | 2.70E-03                       | 0.04                       | 0.62                        | 0.34                             |
| 2   | 1.65E-04                          | 5.28E-03                          | 1.97E-05                      | 0.92            | 1.04E-06                   | 2.30E-03                       | 0.05                       | 0.64                        | 0.31                             |
| 3   | 1.65E-04                          | 5.28E-03                          | 1.97E-05                      | 1.42            | 1.20E-06                   | 2.07E-03                       | 0.05                       | 0.67                        | 0.28                             |
| 4   | 1.65E-04                          | 5.28E-03                          | 1.97E-05                      | 1.89            | 1.26E-06                   | 1.94E-03                       | 0.05                       | 0.66                        | 0.28                             |
| 5   | 1.65E-04                          | 5.28E-03                          | 1.97E-05                      | 2.36            | 1.26E-06                   | 1.86E-03                       |                            |                             |                                  |
| 8   | 1.65E-04                          | 5.28E-03                          | 1.97E-05                      | 2.85            | 1.23E-06                   | 1.81E-03                       | 0.05                       | 0.65                        | 0.29                             |
| 7   | 1.65E-04                          | 5.28E-03                          | 1.97E-05                      | 3.34            | 1.17E-06                   | 1.77E-03                       | 0.06                       | 0.64                        | 0.30                             |
| 8   | 1.65E-04                          | 5.28E-03                          | 1.97E-05                      | 3.87            | 1.09E-06                   | 1.76E-03                       | 0.06                       | 0.63                        | 0.31                             |

**Table S33:** sample composition for the determination of ionic strength effects for the complexation of Np(V) with  $\text{Ox}^{2-}$  as a function of  $I_m(\text{NaCl})$  at  $T = 20\text{ }^\circ\text{C}$  and species distribution obtained by principle component analyses of the absorption spectra.

| Nr. | total concentrations              |                                   |                               | $I_m$<br>(NaCl) | eq. concentration          |                                | species fractions $\chi_i$ |                             |                                  |
|-----|-----------------------------------|-----------------------------------|-------------------------------|-----------------|----------------------------|--------------------------------|----------------------------|-----------------------------|----------------------------------|
|     | $[\text{NpO}_2^+]_{\text{total}}$ | $[\text{Ox}^{2-}]_{\text{total}}$ | $[\text{H}^+]_{\text{total}}$ |                 | $[\text{H}^+]_{\text{eq}}$ | $[\text{Ox}^{2-}]_{\text{eq}}$ | $\text{NpO}_2^+$           | $\text{NpO}_2(\text{Ox})^-$ | $\text{NpO}_2(\text{Ox})_2^{3-}$ |
| 1   | 1.65E-04                          | 1.59E-04                          | 1.97E-05                      | 0.47            | 1.40E-05                   | 9.29E-05                       | 0.70                       | 0.30                        | 0.00                             |
| 2   | 1.65E-04                          | 1.59E-04                          | 1.97E-05                      | 0.98            | 1.51E-05                   | 7.97E-05                       | 0.75                       | 0.25                        | 0.00                             |
| 3   | 1.65E-04                          | 1.59E-04                          | 1.97E-05                      | 1.46            | 1.55E-05                   | 7.31E-05                       | 0.74                       | 0.26                        | 0.00                             |
| 4   | 1.65E-04                          | 1.59E-04                          | 1.97E-05                      | 1.96            | 1.56E-05                   | 6.88E-05                       | 0.74                       | 0.26                        | 0.00                             |
| 5   | 1.65E-04                          | 1.59E-04                          | 1.97E-05                      | 2.48            | 1.56E-05                   | 6.60E-05                       | 0.74                       | 0.26                        | 0.00                             |
| 8   | 1.65E-04                          | 1.59E-04                          | 1.97E-05                      | 2.96            | 1.55E-05                   | 6.43E-05                       | 0.75                       | 0.25                        | 0.00                             |
| 7   | 1.65E-04                          | 1.59E-04                          | 1.97E-05                      | 3.43            | 1.53E-05                   | 6.33E-05                       |                            |                             |                                  |
| 8   | 1.65E-04                          | 1.59E-04                          | 1.97E-05                      | 3.93            | 1.50E-05                   | 6.26E-05                       | 0.76                       | 0.24                        | 0.00                             |

**Table S34:** sample composition for the determination of ionic strength effects for the complexation of Np(V) with  $\text{Ox}^{2-}$  as a function of  $I_m(\text{NaCl})$  at  $T = 30\text{ }^\circ\text{C}$  and species distribution obtained by principle component analyses of the absorption spectra.

| Nr. | total concentrations              |                                   |                               | $I_m$<br>(NaCl) | eq. concentration          |                                | species fractions $\chi_i$ |                             |                                  |
|-----|-----------------------------------|-----------------------------------|-------------------------------|-----------------|----------------------------|--------------------------------|----------------------------|-----------------------------|----------------------------------|
|     | $[\text{NpO}_2^+]_{\text{total}}$ | $[\text{Ox}^{2-}]_{\text{total}}$ | $[\text{H}^+]_{\text{total}}$ |                 | $[\text{H}^+]_{\text{eq}}$ | $[\text{Ox}^{2-}]_{\text{eq}}$ | $\text{NpO}_2^+$           | $\text{NpO}_2(\text{Ox})^-$ | $\text{NpO}_2(\text{Ox})_2^{3-}$ |
| 1   | 1.65E-04                          | 1.59E-04                          | 1.97E-05                      | 0.47            | 1.41E-05                   | 9.61E-05                       | 0.72                       | 0.28                        | 0.00                             |
| 2   | 1.65E-04                          | 1.59E-04                          | 1.97E-05                      | 0.98            | 1.52E-05                   | 8.38E-05                       | 0.76                       | 0.24                        | 0.00                             |
| 3   | 1.65E-04                          | 1.59E-04                          | 1.97E-05                      | 1.46            | 1.56E-05                   | 7.76E-05                       | 0.76                       | 0.24                        | 0.00                             |
| 4   | 1.65E-04                          | 1.59E-04                          | 1.97E-05                      | 1.96            | 1.57E-05                   | 7.36E-05                       | 0.75                       | 0.25                        | 0.00                             |
| 5   | 1.65E-04                          | 1.59E-04                          | 1.97E-05                      | 2.48            | 1.57E-05                   | 7.10E-05                       | 0.75                       | 0.25                        | 0.00                             |
| 8   | 1.65E-04                          | 1.59E-04                          | 1.97E-05                      | 2.96            | 1.55E-05                   | 6.94E-05                       | 0.76                       | 0.24                        | 0.00                             |
| 7   | 1.65E-04                          | 1.59E-04                          | 1.97E-05                      | 3.43            | 1.54E-05                   | 6.84E-05                       | 0.75                       | 0.25                        | 0.00                             |
| 8   | 1.65E-04                          | 1.59E-04                          | 1.97E-05                      | 3.93            | 1.51E-05                   | 6.78E-05                       | 0.76                       | 0.24                        | 0.00                             |

**Table S35:** sample composition for the determination of ionic strength effects for the complexation of Np(V) with  $\text{Ox}^{2-}$  as a function of  $I_m(\text{NaCl})$  at  $T = 40\text{ }^\circ\text{C}$  and species distribution obtained by principle component analyses of the absorption spectra.

| Nr. | total concentrations              |                                   |                               | $I_m$<br>(NaCl) | eq. concentration          |                                | species fractions $\chi_i$ |                             |                                  |
|-----|-----------------------------------|-----------------------------------|-------------------------------|-----------------|----------------------------|--------------------------------|----------------------------|-----------------------------|----------------------------------|
|     | $[\text{NpO}_2^+]_{\text{total}}$ | $[\text{Ox}^{2-}]_{\text{total}}$ | $[\text{H}^+]_{\text{total}}$ |                 | $[\text{H}^+]_{\text{eq}}$ | $[\text{Ox}^{2-}]_{\text{eq}}$ | $\text{NpO}_2^+$           | $\text{NpO}_2(\text{Ox})^-$ | $\text{NpO}_2(\text{Ox})_2^{3-}$ |
| 1   | 1.65E-04                          | 1.59E-04                          | 1.97E-05                      | 0.47            | 1.37E-05                   | 9.32E-05                       | 0.74                       | 0.26                        | 0.00                             |
| 2   | 1.65E-04                          | 1.59E-04                          | 1.97E-05                      | 0.98            | 1.49E-05                   | 8.08E-05                       | 0.78                       | 0.22                        | 0.00                             |
| 3   | 1.65E-04                          | 1.59E-04                          | 1.97E-05                      | 1.46            | 1.53E-05                   | 7.46E-05                       | 0.78                       | 0.22                        | 0.00                             |
| 4   | 1.65E-04                          | 1.59E-04                          | 1.97E-05                      | 1.96            | 1.55E-05                   | 7.06E-05                       | 0.77                       | 0.23                        | 0.00                             |
| 5   | 1.65E-04                          | 1.59E-04                          | 1.97E-05                      | 2.48            | 1.54E-05                   | 6.80E-05                       | 0.77                       | 0.23                        | 0.00                             |
| 8   | 1.65E-04                          | 1.59E-04                          | 1.97E-05                      | 2.96            | 1.53E-05                   | 6.65E-05                       | 0.77                       | 0.23                        | 0.00                             |
| 7   | 1.65E-04                          | 1.59E-04                          | 1.97E-05                      | 3.43            | 1.51E-05                   | 6.55E-05                       | 0.76                       | 0.24                        | 0.00                             |
| 8   | 1.65E-04                          | 1.59E-04                          | 1.97E-05                      | 3.93            | 1.48E-05                   | 6.49E-05                       | 0.76                       | 0.24                        | 0.00                             |

**Table S36:** sample composition for the determination of ionic strength effects for the complexation of Np(V) with  $\text{Ox}^{2-}$  as a function of  $I_m(\text{NaCl})$  at  $T = 50\text{ }^\circ\text{C}$  and species distribution obtained by principle component analyses of the absorption spectra.

| Nr. | total concentrations              |                                   |                               | $I_m$<br>(NaCl) | eq. concentration          |                                | species fractions $\chi_i$ |                             |                                  |
|-----|-----------------------------------|-----------------------------------|-------------------------------|-----------------|----------------------------|--------------------------------|----------------------------|-----------------------------|----------------------------------|
|     | $[\text{NpO}_2^+]_{\text{total}}$ | $[\text{Ox}^{2-}]_{\text{total}}$ | $[\text{H}^+]_{\text{total}}$ |                 | $[\text{H}^+]_{\text{eq}}$ | $[\text{Ox}^{2-}]_{\text{eq}}$ | $\text{NpO}_2^+$           | $\text{NpO}_2(\text{Ox})^-$ | $\text{NpO}_2(\text{Ox})_2^{3-}$ |
| 1   | 1.65E-04                          | 1.59E-04                          | 1.97E-05                      | 0.47            | 1.33E-05                   | 9.01E-05                       | 0.76                       | 0.24                        | 0.00                             |
| 2   | 1.65E-04                          | 1.59E-04                          | 1.97E-05                      | 0.98            | 1.46E-05                   | 7.77E-05                       | 0.79                       | 0.21                        | 0.00                             |
| 3   | 1.65E-04                          | 1.59E-04                          | 1.97E-05                      | 1.46            | 1.50E-05                   | 7.15E-05                       | 0.78                       | 0.22                        | 0.00                             |
| 4   | 1.65E-04                          | 1.59E-04                          | 1.97E-05                      | 1.96            | 1.52E-05                   | 6.75E-05                       | 0.78                       | 0.22                        | 0.00                             |
| 5   | 1.65E-04                          | 1.59E-04                          | 1.97E-05                      | 2.48            | 1.52E-05                   | 6.50E-05                       | 0.77                       | 0.23                        | 0.00                             |
| 8   | 1.65E-04                          | 1.59E-04                          | 1.97E-05                      | 2.96            | 1.50E-05                   | 6.34E-05                       | 0.78                       | 0.22                        | 0.00                             |
| 7   | 1.65E-04                          | 1.59E-04                          | 1.97E-05                      | 3.43            | 1.48E-05                   | 6.25E-05                       | 0.77                       | 0.23                        | 0.00                             |
| 8   | 1.65E-04                          | 1.59E-04                          | 1.97E-05                      | 3.93            | 1.45E-05                   | 6.19E-05                       | 0.77                       | 0.23                        | 0.00                             |

**Table S37:** sample composition for the determination of ionic strength effects for the complexation of Np(V) with  $\text{Ox}^{2-}$  as a function of  $I_m(\text{NaCl})$  at  $T = 60\text{ }^\circ\text{C}$  and species distribution obtained by principle component analyses of the absorption spectra.

| Nr. | total concentrations              |                                   |                               | $I_m$<br>(NaCl) | eq. concentration          |                                | species fractions $\chi_i$ |                             |                                  |
|-----|-----------------------------------|-----------------------------------|-------------------------------|-----------------|----------------------------|--------------------------------|----------------------------|-----------------------------|----------------------------------|
|     | $[\text{NpO}_2^+]_{\text{total}}$ | $[\text{Ox}^{2-}]_{\text{total}}$ | $[\text{H}^+]_{\text{total}}$ |                 | $[\text{H}^+]_{\text{eq}}$ | $[\text{Ox}^{2-}]_{\text{eq}}$ | $\text{NpO}_2^+$           | $\text{NpO}_2(\text{Ox})^-$ | $\text{NpO}_2(\text{Ox})_2^{3-}$ |
| 1   | 1.65E-04                          | 1.59E-04                          | 1.97E-05                      | 0.47            | 1.29E-05                   | 8.68E-05                       | 0.78                       | 0.22                        | 0.00                             |
| 2   | 1.65E-04                          | 1.59E-04                          | 1.97E-05                      | 0.98            | 1.42E-05                   | 7.44E-05                       | 0.81                       | 0.19                        | 0.00                             |
| 3   | 1.65E-04                          | 1.59E-04                          | 1.97E-05                      | 1.46            | 1.47E-05                   | 6.83E-05                       | 0.81                       | 0.19                        | 0.00                             |
| 4   | 1.65E-04                          | 1.59E-04                          | 1.97E-05                      | 1.96            | 1.49E-05                   | 6.43E-05                       | 0.79                       | 0.21                        | 0.00                             |
| 5   | 1.65E-04                          | 1.59E-04                          | 1.97E-05                      | 2.48            | 1.48E-05                   | 6.18E-05                       | 0.79                       | 0.21                        | 0.00                             |
| 8   | 1.65E-04                          | 1.59E-04                          | 1.97E-05                      | 2.96            | 1.47E-05                   | 6.03E-05                       | 0.79                       | 0.21                        | 0.00                             |
| 7   | 1.65E-04                          | 1.59E-04                          | 1.97E-05                      | 3.43            | 1.45E-05                   | 5.94E-05                       | 0.78                       | 0.22                        | 0.00                             |
| 8   | 1.65E-04                          | 1.59E-04                          | 1.97E-05                      | 3.93            | 1.42E-05                   | 5.88E-05                       | 0.78                       | 0.22                        | 0.00                             |

**Table S38:** sample composition for the determination of ionic strength effects for the complexation of Np(V) with  $\text{Ox}^{2-}$  as a function of  $I_m(\text{NaCl})$  at  $T = 70\text{ }^\circ\text{C}$  and species distribution obtained by principle component analyses of the absorption spectra.

| Nr. | total concentrations              |                                   |                               | $I_m$<br>(NaCl) | eq. concentration          |                                | species fractions $\chi_i$ |                             |                                  |
|-----|-----------------------------------|-----------------------------------|-------------------------------|-----------------|----------------------------|--------------------------------|----------------------------|-----------------------------|----------------------------------|
|     | $[\text{NpO}_2^+]_{\text{total}}$ | $[\text{Ox}^{2-}]_{\text{total}}$ | $[\text{H}^+]_{\text{total}}$ |                 | $[\text{H}^+]_{\text{eq}}$ | $[\text{Ox}^{2-}]_{\text{eq}}$ | $\text{NpO}_2^+$           | $\text{NpO}_2(\text{Ox})^-$ | $\text{NpO}_2(\text{Ox})_2^{3-}$ |
| 1   | 1.65E-04                          | 1.59E-04                          | 1.97E-05                      | 0.47            | 1.24E-05                   | 8.34E-05                       | 0.80                       | 0.20                        | 0.00                             |
| 2   | 1.65E-04                          | 1.59E-04                          | 1.97E-05                      | 0.98            | 1.38E-05                   | 7.09E-05                       | 0.82                       | 0.18                        | 0.00                             |
| 3   | 1.65E-04                          | 1.59E-04                          | 1.97E-05                      | 1.46            | 1.43E-05                   | 6.49E-05                       | 0.82                       | 0.18                        | 0.00                             |
| 4   | 1.65E-04                          | 1.59E-04                          | 1.97E-05                      | 1.96            | 1.45E-05                   | 6.10E-05                       | 0.81                       | 0.19                        | 0.00                             |
| 5   | 1.65E-04                          | 1.59E-04                          | 1.97E-05                      | 2.48            | 1.45E-05                   | 5.86E-05                       | 0.80                       | 0.20                        | 0.00                             |
| 8   | 1.65E-04                          | 1.59E-04                          | 1.97E-05                      | 2.96            | 1.43E-05                   | 5.71E-05                       | 0.80                       | 0.20                        | 0.00                             |
| 7   | 1.65E-04                          | 1.59E-04                          | 1.97E-05                      | 3.43            | 1.41E-05                   | 5.62E-05                       | 0.80                       | 0.20                        | 0.00                             |
| 8   | 1.65E-04                          | 1.59E-04                          | 1.97E-05                      | 3.93            | 1.38E-05                   | 5.56E-05                       | 0.80                       | 0.20                        | 0.00                             |

**Table S39:** sample composition for the determination of ionic strength effects for the complexation of Np(V) with  $\text{Ox}^{2-}$  as a function of  $I_m(\text{NaCl})$  at  $T = 80^\circ\text{C}$  and species distribution obtained by principle component analyses of the absorption spectra.

| Nr. | total concentrations              |                                   |                               | $I_m$<br>(NaCl) | eq. concentration          |                                | species fractions $\chi_i$ |                             |                                  |
|-----|-----------------------------------|-----------------------------------|-------------------------------|-----------------|----------------------------|--------------------------------|----------------------------|-----------------------------|----------------------------------|
|     | $[\text{NpO}_2^+]_{\text{total}}$ | $[\text{Ox}^{2-}]_{\text{total}}$ | $[\text{H}^+]_{\text{total}}$ |                 | $[\text{H}^+]_{\text{eq}}$ | $[\text{Ox}^{2-}]_{\text{eq}}$ | $\text{NpO}_2^+$           | $\text{NpO}_2(\text{Ox})^-$ | $\text{NpO}_2(\text{Ox})_2^{3-}$ |
| 1   | 1.65E-04                          | 1.59E-04                          | 1.97E-05                      | 0.47            | 1.18E-05                   | 7.98E-05                       | 0.84                       | 0.16                        | 0.00                             |
| 2   | 1.65E-04                          | 1.59E-04                          | 1.97E-05                      | 0.98            | 1.34E-05                   | 6.74E-05                       | 0.85                       | 0.15                        | 0.00                             |
| 3   | 1.65E-04                          | 1.59E-04                          | 1.97E-05                      | 1.46            | 1.39E-05                   | 6.15E-05                       | 0.84                       | 0.16                        | 0.00                             |
| 4   | 1.65E-04                          | 1.59E-04                          | 1.97E-05                      | 1.96            | 1.41E-05                   | 5.77E-05                       | 0.82                       | 0.18                        | 0.00                             |
| 5   | 1.65E-04                          | 1.59E-04                          | 1.97E-05                      | 2.48            | 1.41E-05                   | 5.53E-05                       | 0.81                       | 0.19                        | 0.00                             |
| 8   | 1.65E-04                          | 1.59E-04                          | 1.97E-05                      | 2.96            | 1.39E-05                   | 5.38E-05                       | 0.80                       | 0.20                        | 0.00                             |
| 7   | 1.65E-04                          | 1.59E-04                          | 1.97E-05                      | 3.43            | 1.37E-05                   | 5.29E-05                       | 0.80                       | 0.20                        | 0.00                             |
| 8   | 1.65E-04                          | 1.59E-04                          | 1.97E-05                      | 3.93            | 1.34E-05                   | 5.24E-05                       | 0.80                       | 0.20                        | 0.00                             |

**Table S40:** sample composition for the determination of ionic strength effects for the complexation of Np(V) with  $\text{Ox}^{2-}$  as a function of  $I_m(\text{NaCl})$  at  $T = 85^\circ\text{C}$  and species distribution obtained by principle component analyses of the absorption spectra.

| Nr. | total concentrations              |                                   |                               | $I_m$<br>(NaCl) | eq. concentration          |                                | species fractions $\chi_i$ |                             |                                  |
|-----|-----------------------------------|-----------------------------------|-------------------------------|-----------------|----------------------------|--------------------------------|----------------------------|-----------------------------|----------------------------------|
|     | $[\text{NpO}_2^+]_{\text{total}}$ | $[\text{Ox}^{2-}]_{\text{total}}$ | $[\text{H}^+]_{\text{total}}$ |                 | $[\text{H}^+]_{\text{eq}}$ | $[\text{Ox}^{2-}]_{\text{eq}}$ | $\text{NpO}_2^+$           | $\text{NpO}_2(\text{Ox})^-$ | $\text{NpO}_2(\text{Ox})_2^{3-}$ |
| 1   | 1.65E-04                          | 1.59E-04                          | 1.97E-05                      | 0.47            | 1.15E-05                   | 7.79E-05                       | 0.86                       | 0.14                        | 0.00                             |
| 2   | 1.65E-04                          | 1.59E-04                          | 1.97E-05                      | 0.98            | 1.31E-05                   | 6.56E-05                       | 0.86                       | 0.14                        | 0.00                             |
| 3   | 1.65E-04                          | 1.59E-04                          | 1.97E-05                      | 1.46            | 1.37E-05                   | 5.97E-05                       | 0.84                       | 0.16                        | 0.00                             |
| 4   | 1.65E-04                          | 1.59E-04                          | 1.97E-05                      | 1.96            | 1.38E-05                   | 5.60E-05                       | 0.82                       | 0.18                        | 0.00                             |
| 5   | 1.65E-04                          | 1.59E-04                          | 1.97E-05                      | 2.48            | 1.38E-05                   | 5.36E-05                       | 0.81                       | 0.19                        | 0.00                             |
| 8   | 1.65E-04                          | 1.59E-04                          | 1.97E-05                      | 2.96            | 1.37E-05                   | 5.22E-05                       | 0.81                       | 0.19                        | 0.00                             |
| 7   | 1.65E-04                          | 1.59E-04                          | 1.97E-05                      | 3.43            | 1.35E-05                   | 5.13E-05                       | 0.81                       | 0.19                        | 0.00                             |
| 8   | 1.65E-04                          | 1.59E-04                          | 1.97E-05                      | 3.93            | 1.31E-05                   | 5.08E-05                       | 0.81                       | 0.19                        | 0.00                             |
